# Supplementary material for: Deterministic Control of Sn3+ Valence and Electronic Phase Evolution in AgSnSe2
Source: Research Square preprint supplement (doi:10.21203/rs.3.rs-8243057/v1), 2025-12-08
Supplement: Supplementary file 1 [file 4a9c51becfb9ba11af432342.pdf]

## **Supporting Information**

### **Deterministic Control of Sn<sup>3+</sup> Valence and Electronic Phase Evolution in AgSnSe<sub>2</sub>**

Paribesh Acharyya,<sup>1</sup> Yukun Liu,<sup>2</sup> Shima Shahabfar,<sup>2</sup> Hengdi Zhao,<sup>3</sup> Yihao Wang,<sup>3</sup> Anuradha Bhogra,<sup>3</sup> Thomas San Ie,<sup>1</sup> Kodimana Ramakrishnan Pradeep,<sup>1</sup> Christos D Malliakas,<sup>1</sup> Juncen Li,<sup>5</sup> Lawrence Rhoads,<sup>5</sup> Yuelin Kuang,<sup>5</sup> Matthew A Grayson,<sup>5</sup> Vinayak P Dravid,<sup>2</sup> Duck Young Chung,<sup>3</sup> Christopher Wolverton,<sup>2</sup> Alexios P. Douvalis,<sup>\*,6</sup> and Mercouri G Kanatzidis<sup>\*,1,3</sup>

<sup>1</sup>*Northwestern University Department of Chemistry, Evanston, IL 60208 USA*

<sup>2</sup>*Department of Materials Science and Engineering, Northwestern University, Evanston, Illinois 60208, United States*

<sup>3</sup>*Materials Science Division, Argonne National Laboratory, Lemont, IL 60439 USA*

<sup>4</sup>*Deutsches Elektronen-Synchrotron DESY, Notkestr. 85, 22607 Hamburg, Germany*

<sup>5</sup>*Electrical & Computer Engineering, Northwestern University, Evanston, Illinois 60208, USA*

<sup>6</sup>*Department of Physics, University of Ioannina, Ioannina, 45110, Greece*

*\*Corresponding author: [adouval@uoi.gr](mailto:adouval@uoi.gr); [m-kanatzidis@northwestern.edu](mailto:m-kanatzidis@northwestern.edu)*

## Experimental Section

### Materials

silver shots (Ag,  $\geq 99.99\%$ , Sigma Aldrich), tin balls (Sn, 99.999%, Sigma Aldrich), antimony shots (Sb, 99.999%, American Elements), and selenium shots (Se,  $\geq 99.99\%$ , Alfa Aesar) were used for synthesis without further purification.

### Synthesis

#### Synthesis of $\text{AgSn}_{1-x}\text{Sb}_x\text{Se}_2$ ( $x=0-0.99$ )

High quality polycrystalline ingots of  $\text{AgSnSe}_2$  were synthesized by mixing appropriate ratio of starting element of Ag, Sn, and Se in a quartz tube (13 mm outer diameter, 11 mm inner diameter). The tubes were sealed under high vacuum ( $10^{-3}$  mbar) and slowly heated to 673 K over 12 h and then heated up to 1123 K over 4 h, soaked for 10 h and finally cooled down to room temperature over 10 h. Similar reaction procedure were followed for Sb doped/substituted  $\text{AgSnSe}_2$  samples.

#### Synthesis of SnSe

High quality polycrystalline ingots of SnSe were synthesized by mixing appropriate ratio of starting element of Sn, and Se in a quartz tube (13 mm outer diameter, 11 mm inner diameter). The tubes were sealed under high vacuum ( $10^{-3}$  mbar) and slowly heated to 673 K over 12 h and then heated up to 1223 K over 4 h, soaked for 10 h and finally cooled down to room temperature over 10 h. The PXRD pattern of as-synthesized SnSe is shown in **Figure S25a**.

#### Synthesis of $\text{SnSe}_2$

High quality polycrystalline ingots of  $\text{SnSe}_2$  were synthesized by mixing appropriate ratio of starting element of Sn, and Se in a quartz tube (13 mm outer diameter, 11 mm inner diameter). The tubes were sealed under high vacuum ( $10^{-3}$  mbar) and slowly heated to 673 K over 12 h and then heated up to 1323 K over 4 h, soaked for 10 h and finally cooled down to room temperature over 20 h. The PXRD pattern of as-synthesized  $\text{SnSe}_2$  is shown in **Figure S25b**.

#### Single crystal X-ray diffraction (SCXRD)

For the acquisition of intensity data, a suitable single crystal of  $\text{AgSn}_{1-x}\text{Sb}_x\text{Se}_2$  ( $x=0$  and 0.5) was mounted on a loop with paratone oil and mounted onto a XtaLAB Synergy Diffractometer. The XtaLAB Synergy diffractometer was equipped with a microfocus-sealed X-ray tube

PhotonJet (Mo) X-ray source and a Hybrid Pixel Array Detector (HyPix). The temperature of the crystals was controlled with an Oxford Cryosystems low-temperature device. Data reduction was performed with the CrysAlisPro software (Rigaku) using an empirical and numerical absorption correction.  $\text{AgSn}_{1-x}\text{Sb}_x\text{Se}_2$  ( $x = 0$  and  $0.5$ ) was solved with the ShelXT<sup>1</sup> structure solution program using the intrinsic phasing solution method and by using Olex2<sup>2</sup> as the graphical interface. The model was refined with ShelXL<sup>3</sup> using least squares minimization. All crystal data from the SCXRD experiments can be found in **Tables S1-S8**.

### **Powder X-ray diffraction (PXRD)**

PXRD patterns were obtained using a Rigaku Miniflex 5600 diffractometer with  $\text{Cu K}\alpha$  ( $\lambda = 1.5406 \text{ \AA}$ ) radiation. The diffraction data were collected over a  $2\theta$  range of  $5^\circ$  to  $90^\circ$ , using a scan step size of  $0.02^\circ$  and a scanning rate of  $10^\circ$  per minute. Le Bail refinement was performed using the FullProf program.<sup>4</sup>

### **X-ray Pair Distribution Function (X-PDF)**

Total scattering data for  $\text{AgSn}_{1-x}\text{Sb}_x\text{Se}_2$  ( $x = 0$  and  $0.5$ ) were collected at room temperature. Each sample was loaded into a Kapton capillary ( $\sim 1 \text{ mm}$  in diameter) and mounted on a STOE StadiVari diffractometer equipped with an AXO  $\text{Ag K}\alpha$  microfocus sealed X-ray source AMiXS, running at  $65 \text{ kV}$  and  $0.68 \text{ mA}$ , and a Dectris Pilatus3 R CdTe  $300 \text{ K}$  Hybrid Photon Counting detector. The data were integrated using the program GSAS-II. The total scattering structure function,  $S(Q)$ , was Fourier transformed to obtain the real-space pair distribution function,  $G(r)$ , using the program PDFgetX3.<sup>5</sup> PDF refinements were performed in PDFgui,<sup>6</sup> with structural models refined over an  $r$ -range of  $2\text{--}20 \text{ \AA}$ . The goodness-of-fit ( $R_w$ ) value for  $\text{AgSnSe}_2$  and  $\text{AgSn}_{0.5}\text{Sb}_{0.5}\text{Se}_2$  are  $10.9$  and  $11\%$  respectively.

### **Differential Thermal Analysis (DTA)**

Thermogravimetric thermal analyses were performed in a Netzsch STA 449 F3 Jupiter Simultaneous Thermal Analysis (STA) instrument.  $\sim 10 \text{ mg}$  of sample was sealed in a quartz ampule under vacuum ( $\sim 3 \times 10^{-3} \text{ mbar}$ ). DTA data was measured under Nitrogen gas ( $25 \text{ mL/min}$ ). The temperature was increased/decreased at a rate of  $10^\circ\text{C/min}$  from room temperature to  $900^\circ\text{C}$ . A similarly sealed ampule of  $\sim 50 \text{ mg}$  of  $\text{Al}_2\text{O}_3$  was used as a reference.

### **Optical band gap measurement**

The optical band gap was determined by infrared spectroscopy instrument (Nicolet 6700 FT-IR spectrometer) in the mid-IR range (6000~400  $\text{cm}^{-1}$ ). The electronic energy band gaps were calculated based on the Kubelka-Munk relationship:  $\alpha/S = (1-R)^2/2R$ , where  $\alpha$  and S are the absorption and scattering coefficients, respectively, and R is the reflectance.

### **X-ray photoelectron spectroscopy measurements (XPS)**

XPS were performed using a Thermo Scientific Nexsa G2 system (monochromated Al  $K\alpha$  radiation,  $\sim 1486.6$  eV) at a pressure of  $\sim 6.4 \times 10^{-7}$  mbar and with an analysis spot size of 50  $\mu\text{m}$ . Samples were charge compensated with a flood gun. The surface contamination was removed with Ar beam sputtering.

### **Scanning/transmission electron microscopy (S/TEM) analysis**

High-resolution S/TEM (HR-S/TEM) imaging was conducted using an aberration-corrected JEM-ARM200F microscope (JEOL Ltd, Japan) operating at 200 kV. A condenser aperture was selected to provide a convergence semiangle of 27.5 mrad. Electron energy loss spectrum was acquired using a JEM-ARM300F (JEOL Ltd, Japan) operating at 300 kV equipped with a Gatan GIF Continuum K3 system. To prepare the electron-beam transmitted TEM specimens, the bulk samples were first ground and polished to a thickness of  $\sim 30$   $\mu\text{m}$ , followed by Ar-ion milling (3 kV for  $\sim 30$  min until a hole was formed, and ion cleaning at 0.3 kV for 40 min at a low temperature (liquid nitrogen stage). Scanning electron microscopic (SEM) analyses were performed using a Schottky field-emission SEM (JEOL JSM-7900FLV SEM) at 20 kV.

### **Mössbauer spectroscopy**

$^{119}\text{Sn}$  Mossbauer spectra of the ground  $\text{AgSn}_{1-x}\text{Sb}_x\text{Se}_2$  powder samples were collected at 80 K in transmission geometry, using a constant-acceleration Mössbauer spectrometer equipped with a  $\text{Ca}^{119\text{m}}\text{SnO}_3$  source kept at RT and a variable-temperature liquid nitrogen bath cryostat (Oxford Instruments Variox 760). The spectrometer was calibrated with metallic iron at 80 K and the analyses of the spectra were performed by the IMSEG code.<sup>7</sup> The isomer shift values are given relative to  $\text{SnO}_2$  at room temperature (300 K).

For data fitting, we considered i) the relative literature on the  $\text{AgSnSe}_2$  Mössbauer spectra analyses,<sup>8-10</sup> which suggest the use of a single-line (with zero quadrupole splitting  $QS=0$ ) component (singlet) and ii) our XRD results and analyses, which suggest that the crystal structure of all samples adopts the FCC NaCl-type symmetry.

The obvious selection to use only two singlets to fit the Mössbauer spectra of the  $x \geq 0.5$  samples gave appropriate fitting quality parameters [ $\chi^2 = \sum (y_{\text{exp}} - y_{\text{fit}})^2$ ] only for  $x = 0.9$  and  $0.8$ , while for  $x = 0.7$  and  $0.5$  a third singlet was necessary to be included in the model to improve the fitting quality. Applying this three-singlets model to the MS of the lower  $x$  values samples down to  $x = 0.1$  gave adequate fitting results in all cases. All the fitted spectra are presented in **Figure 3b-e** and **Figure S9**. The resulting Mössbauer parameters from these fits are listed in **Table S10** and the plots of the IS and absorption area (AA) values as a function of  $x$  appear in **Figure S11**. The IS values of these three singlets indicate the simultaneous presence of  $\text{Sn}^{3+}$ ,  $\text{Sn}^{2+}$  and  $\text{Sn}^{4+}$  species in the samples.

### **X-ray absorption measurements**

The samples for X-ray absorption measurements were prepared by homogeneously mixing the powders with cellulose to achieve an X-ray absorption edge jump close to one, followed by pressing the mixture into pellets. X-ray absorption measurements were performed at the Sn K-edge (29.2 keV) on Beamline P65 at PETRA III, operating in transmission mode using gas ionization chambers filled with suitable gases. The incident X-ray photon energies were selected using a Si (311) double-crystal monochromator (DCM). For X-ray beam energy calibration, the transmission signal of a Sn reference foil was used. The beam size was set using slits to a dimension of 0.3 (vertical)  $\times$  1.5 (horizontal) mm<sup>2</sup>.

Data were processed using Athena software by extracting the EXAFS oscillations  $\chi(k)$  as a function of photoelectron wavenumber  $k$  following standard procedures.<sup>11</sup> The theoretical model and corresponding paths were generated using FEFF6 based on a calculated ordered CIF of  $\text{AgSnSe}_2$ . The fitting of the theoretical model to the experimental data was carried out using the fitting program Artemis with FEFF6 built into it.<sup>11</sup> To isolate the  $\chi(k)$  oscillations, the atomic background was subtracted by applying a low distance cut-off equal to 1 Å in the Fourier transform and using a cubic spline. Fourier filtering was accomplished with a  $k$  weight equal to 2, ranging from 2 to  $\sim 10$  Å<sup>-1</sup>. Fitting parameters were obtained by modelling the EXAFS data of each sample in real( $R$ )-space until a satisfactory global fit describing the system was obtained.

### **Heat capacity ( $C_p$ ) measurement**

Low-temperature heat capacity ( $C_p$ ) of  $\text{AgSnSe}_2$  was measured in a Quantum Design Dynacool Physical Property Measurement System (Dynacool-PPMS) in the temperature range of 2 - 300

K. A sample puck with the appropriate amount of Apiezon N grease was first measured as the background. The sample heat capacity was measured afterward by mounting a sample on top of the sample puck. The measurement was performed using a time relaxation method. We attempted to fit the low-temperature  $C_p$  data using the Debye–Einstein model:<sup>12,13</sup>

$$\frac{C_p}{T} = \gamma + \beta T^2 + \sum_n \left( A_n (\theta_{E_n})^2 \cdot (T^2)^{-3/2} \cdot \frac{e^{\theta_{E_n}/T}}{(e^{\theta_{E_n}/T} - 1)^2} \right)$$

in which  $\gamma$  is Sommerfeld coefficient and accounts for electronic contribution.  $\beta = C(12\pi^4 N_A k_B / 5) \cdot (\theta_D)^{-3}$  signifies the lattice contribution, where  $N_A$ ,  $k_B$  and  $\theta_D$  are the Avogadro's number, Boltzmann constant and Debye temperature, respectively and  $C$  is defined as,  $C = 1 - \sum_n A_n / 3NR$ , where  $N$  represents the number of atoms per formula unit and  $R$  denotes the universal gas constant ( $R = 8.314 \text{ J mol}^{-1} \text{ K}^{-1}$ ). The third term in equation 1 describes the contributions of Einstein oscillators corresponding to the localized vibrations, where  $\theta_{E_n}$  is the Einstein temperature for the  $n^{\text{th}}$  mode.

## Electrical transport

Electrical conductivity and Seebeck coefficients of all the samples ( $2 \times 2 \times 8 \text{ mm}^3$ ) were measured simultaneously under a Helium atmosphere in an ULVAC-RIKO ZEM-3 instrument from room temperature to 673 K.

Low-temperature electrical resistivity measurements from 1.8 - 300 K were performed in a Quantum Design Dynacool Physical Property Measurement System (Dynacool-PPMS). Both DuPont 4929N-100 silver paint and H-20E silver epoxy were tested initially and were found to be undesirable, possibly due to the reaction between silver and the sample. After testing different ways of bonding wires (commercial solder, gallium, and indium), we conclude that indium is the best bonding agent to make electric contact. Standard four-lead methods were used to measure the longitudinal electrical resistivity ( $\rho_{xx}$ ) with 25  $\mu\text{m}$  thin gold wire bonded to the mirror-like surface via indium.

## Hall measurement

Hall coefficient ( $R_H$ ) was measured on a homemade apparatus. The Van der Pauw method was used on  $\sim 5 \times 5 \times 0.3 \text{ mm}^3$  plate samples. The Hall resistance was monitored by a Stanford Research System SR860 Lock-in amplifier at 13Hz for higher signal-to-noise level. Depending

on the sample, the magnetic field was chosen from 9 to 16 T, provided by a superconducting magnet. The Hall resistance at negative field was measured by switching to the Onsager conjugate pair. The Hall coefficient was calculated from  $R_H = (R_{AC,BD}(B) - R_{BD,AC}(B))/2B$ . The apparent charge carrier concentration is given by  $\rho_H = \frac{1}{eR_H}$  assuming single carrier.

### Magnetic susceptibility

The dc-magnetic susceptibility measurements from 1.8 - 300 K were performed in a superconducting quantum interference device (SQUID) from Quantum Design Magnetic Property Measurement System (MPMS-3).

### Thermal transport

Thermal diffusivity (D) of the samples (~ 1 mm thickness) were measured in a Netzsch LFA-457 instrument in the temperature range 300–673 K under a Nitrogen atmosphere (**Figure S22**). The total thermal conductivity ( $\kappa_{\text{total}}$ ) was calculated using the formula  $\kappa_{\text{total}} = D \times \rho \times C_p$  where  $\rho$  is the density of the sample and  $C_p$  is the heat capacity of the sample. Here we have used Dulong–Petit’s  $C_p$  value ( $0.25 \text{ J g}^{-1} \text{ K}^{-1}$ ) to calculate the  $\kappa_{\text{total}}$  of all the samples. The obtained density of all the samples is mentioned in **Table S18**. The error in thermal conductivity measurement is ~5%. To determine the lattice thermal conductivity of  $\text{AgSnSe}_2$  ( $\kappa_L = \kappa - \kappa_e$ ), the electronic contribution ( $\kappa_e$ , **Figure S24a**) was estimated using the Wiedemann–Franz law,  $\kappa_e = L\sigma T$ , where  $L$  is the temperature dependent Lorenz number.<sup>14</sup>

### Computational details

First-principles calculations were performed within density functional theory (DFT) using the projector augmented wave (PAW)<sup>15,16</sup> method and the Perdew–Burke–Ernzerhof (PBE)<sup>17</sup> generalized gradient approximation (GGA)<sup>18</sup> as implemented in the Vienna Ab initio Simulation Package (VASP).<sup>19,20</sup> A plane-wave kinetic energy cutoff of 600 eV was used. All structures were relaxed until the residual forces on each atom were less than 0.1 meV/atom.

$\text{AgSnSe}_2$ ,  $\text{AgSbSe}_2$ , and Sn-doped  $\text{AgSbSe}_2$  were modelled using special quasi-random structures (SQS) generated with the ICET package.<sup>21</sup> A 64-atom supercell was chosen to balance accuracy and computational cost. After full structural relaxation, electronic band structures were computed. Band unfolding was not performed, as the focus here is on

qualitative features of the electronic structure (e.g., metallic vs. semiconducting behavior) rather than detailed dispersion analysis.

### Detailed thermoelectric Properties

Thermoelectric (TE) materials present a compelling avenue for sustainable energy technologies by enabling direct conversion of heat (particularly industrial or environmental waste heat) into electricity, all without the release of greenhouse gases or moving parts.<sup>22-27</sup>

AgSnSe<sub>2</sub> exhibits a superconductor to metal transition at ~ 5 K. So above 5 K, AgSnSe<sub>2</sub> exhibits metallic behaviour.<sup>28</sup> The room temperature  $\sigma$  is ~ 3056 S/cm (**Figure S19a**). Due to its high  $\sigma$  and carrier concentration ( $n$ ) of ~  $2.4 \times 10^{22} \text{ cm}^{-3}$  (**Table S15**), AgSnSe<sub>2</sub> is used to enhance the  $\sigma$  of state-of-the-art TE materials like SnSe,<sup>29</sup> Bi<sub>0.5</sub>Sb<sub>1.5</sub>Te<sub>3</sub>,<sup>30</sup> and many more.<sup>31-34</sup> Despite its promising electrical properties, the intrinsic TE performance of AgSnSe<sub>2</sub> itself remains largely unexplored. Notably, AgBQ<sub>2</sub>-type compounds (B = Sb, Bi; Q = S, Se, Te) have garnered increasing attention as potential high-performance TE materials. These systems are known for their ultralow lattice thermal conductivity ( $\kappa_L$ ), primarily attributed to the stereochemically active lone-pair electrons at the B-site cations.<sup>23,35-39</sup> While AgSnSe<sub>2</sub> shares the same ABX<sub>2</sub>-type structural motif and exhibits compositional similarities with this class of materials, its TE behavior has not been studied in depth. This lack of understanding stems from uncertainties regarding its crystal structure, oxidation states, and electronic structure which are essential for optimizing TE performance. Therefore, a comprehensive structural and electronic investigation of AgSnSe<sub>2</sub> is crucial to unlocking its potential as a TE material. This motivates us to explore and improve its TE properties. For optimization, we systematically substitute Sb at the Sn site to tune its carrier concentration, as AgSbSe<sub>2</sub> is a well-known semiconductor with a room temperature  $\sigma$  of ~4.5 S/cm.<sup>40</sup>

We synthesized a series of polycrystalline AgSn<sub>1-x</sub>Sb<sub>x</sub>Se<sub>2</sub> compounds ( $x = 0-0.99$ ) to explore their TE performance. The corresponding powder X-ray diffraction (PXRD) patterns are shown in **Figure S10**. With increasing Sb content, the diffraction peaks gradually shift toward lower angles, leading to lattice expansion. This systematic shift confirms the successful incorporation of Sb into the crystal structure. A similar systematic shift in diffraction peaks was also observed by the Zybala group.<sup>41</sup> Differential thermal analysis (DTA) of AgSnSe<sub>2</sub> revealed a melting point at 555 °C and recrystallization peak at 527 °C (**Figure S20a**). Post-DTA PXRD patterns showed no evidence of any structural transformation (**Figure S20b**). Therefore, the TE properties of all samples were measured up to 400 °C, which is well below the observed melting point.



**Figure S19** illustrates the TE properties of  $\text{AgSn}_{1-x}\text{Sb}_x\text{Se}_2$  compounds ( $x = 0-0.99$ ). The temperature-dependent  $\sigma$  of  $\text{AgSnSe}_2$  shows metallic behavior in the temperature range of 300-673 K, decreasing with increasing temperature (**Figure S19a**). Due to this metallic conductivity ( $\sigma$  is  $\sim 3056 \text{ S/cm}$  at 300 K), no optical band gap could be detected within the measured energy range of 0.1-0.8 eV (**Figure S21**). With increasing Sb content, the  $\sigma$  gradually decreases, as shown in **Figure S19a**. Interestingly, at 40% Sb substitution, the system exhibits semiconducting behavior, whereas compositions with Sb content below 40% retain metallic-like conductivity. Beyond this threshold, the samples clearly show semiconducting-like transport characteristics. The unusually high  $\sigma$  of  $\text{AgSnSe}_2$  can be attributed to the presence of Sn in the +3 oxidation state (**Figure 3a,b,f**), corresponding to an average  $5s^1$  electronic configuration that facilitates charge delocalization. To highlight this behavior, we compared the  $\sigma$  of  $\text{AgSnSe}_2$  with that of  $\text{SnSe}$  and  $\text{SnSe}_2$ , which exhibit significantly lower  $\sigma$  due to their stable  $\text{Sn}^{2+}$  ( $5s^2$ ) and  $\text{Sn}^{4+}$  ( $5s^0$ ) states, respectively. Furthermore, substituting Sn with Sb in  $\text{AgSn}_{0.5}\text{Sb}_{0.5}\text{Se}_2$  suppresses the conductivity, as Sn tends to exhibit +2 and +4 oxidation states rather than +3 under such substitution (**Figure 3e**), as evident by the Mössbauer spectroscopy results. These comparisons, as shown in **Table S16** underscore the crucial role of  $\text{Sn}^{3+}$  in enabling metallic transport in  $\text{AgSnSe}_2$ . Correspondingly, the room temperature  $S$  of  $\text{AgSnSe}_2$  is extremely low ( $\sim 0.08 \mu\text{V/K}$ ), and it increases modestly with temperature, reaching a maximum of  $\sim 5 \mu\text{V/K}$  at 673 K (**Figure S19b**), consistent with its metallic nature. Upon increasing Sb content,  $S$  increases significantly which is an indicative of a gradual transition from metallic to semiconducting behavior. Notably,  $\text{AgSn}_{0.01}\text{Sb}_{0.99}\text{Se}_2$  exhibits a very high  $S$  of  $\sim 737 \mu\text{V/K}$  at 300 K. The temperature dependence of  $S$  further supports this transition: in  $\text{AgSn}_{1-x}\text{Sb}_x\text{Se}_2$  ( $x = 0-0.4$ ),  $S$  increases with temperature, as expected for metals or degenerate semiconductors,<sup>42</sup> while for  $x > 0.4$ ,  $S$  decreases with temperature a characteristic signature of intrinsic semiconductors.<sup>43</sup> The corresponding power factor ( $\sigma S^2$ ) is shown in **Figure S19c**.

To gain insights into how Sb substitution influences the thermal transport in  $\text{AgSnSe}_2$ , we measured the temperature-dependent  $\kappa$  of  $\text{AgSn}_{1-x}\text{Sb}_x\text{Se}_2$  ( $x = 0-0.99$ ), as shown in **Figure S19d**. A clear trend of decreasing  $\kappa$  with increasing Sb content is observed. While pristine  $\text{AgSnSe}_2$  exhibits a room-temperature  $\kappa$  of  $2.8 \text{ W/m}\cdot\text{K}$ , heavy Sb substitution leads to a drastic reduction, reaching as low as  $0.5 \text{ W/m}\cdot\text{K}$  for  $\text{AgSn}_{0.01}\text{Sb}_{0.99}\text{Se}_2$  highlighting the strong impact of chemical tuning on phonon transport. As a result, a moderate  $zT$  of  $\sim 0.5$  is achieved for the  $\text{AgSn}_{0.01}\text{Sb}_{0.99}\text{Se}_2$  sample (**Figure S23**). The  $\kappa_L$  of  $\text{AgSnSe}_2$  samples is illustrated in **Figure S24b**. The  $\kappa_L$  of  $\text{AgSnSe}_2$  is  $\sim 1 \text{ W/m}\cdot\text{K}$  at room temperature and decreases with increasing temperature, a trend characteristic of crystalline solids.<sup>44,45</sup> Further to understand the

experimentally observed low  $\kappa_L$  in AgSnSe<sub>2</sub>, we measured the heat capacity ( $C_p$ ) in the temperature range of 2–300 K (**Figure S17**). The  $C_p$  data in the 2–47 K range were fitted using a Debye–Einstein model (**Figure S17c**) incorporating three Einstein modes (see methods and **Table S17**).<sup>12,13</sup> The Debye temperature is 202 K and three Einstein temperature are 122 K (85 cm<sup>-1</sup>), 23 K (16 cm<sup>-1</sup>), and 62 K (43 cm<sup>-1</sup>) as mentioned in **Table S17**. Further a distinct peak near 10 K is observed in the  $C_p/T^3$  versus T plot (inset of **Figure S17c**), similar to features reported in other low- $\kappa_L$  materials.<sup>46,47</sup> This anomaly is indicative of an excess phonon density of states present in AgSnSe<sub>2</sub>. These low-energy optical phonons interact strongly with acoustic heat-carrying modes, thereby suppressing phonon transport and contributing to the intrinsically low  $\kappa_L$  in this compound. Additionally, a distinct anomaly near 4.5 K marks the superconducting transition temperature underscoring the complex interplay between lattice dynamics and electronic ground states in AgSnSe<sub>2</sub>.

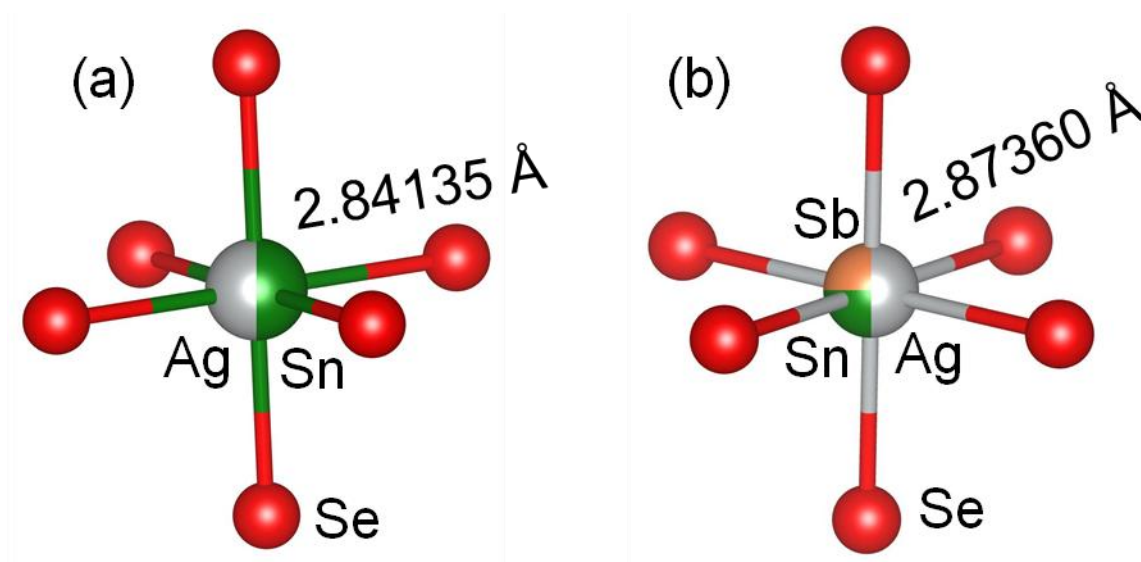

**Figure S1.** Octahedral unit of (a)  $\text{AgSnSe}_2$  and (b)  $\text{AgSn}_{0.5}\text{Sb}_{0.5}\text{Se}_2$ . Ag, Sn, Sb and Se atoms are denoted by the grey, blue, orange and green spheres respectively.

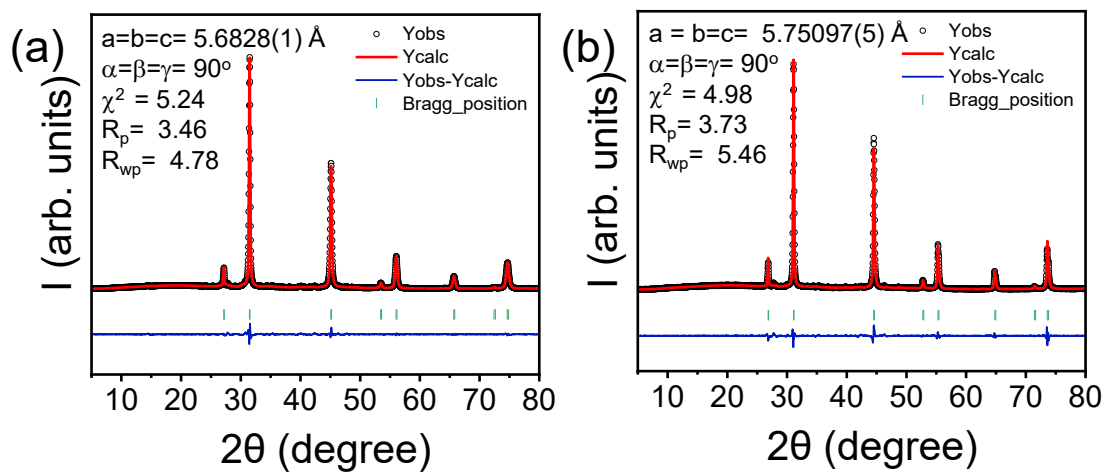

**Figure S2.** Le Bail refinement of the structural model of (a)  $\text{AgSnSe}_2$  and (b)  $\text{AgSn}_{0.5}\text{Sb}_{0.5}\text{Se}_2$  from the powder X-ray diffraction data recorded at room temperature.

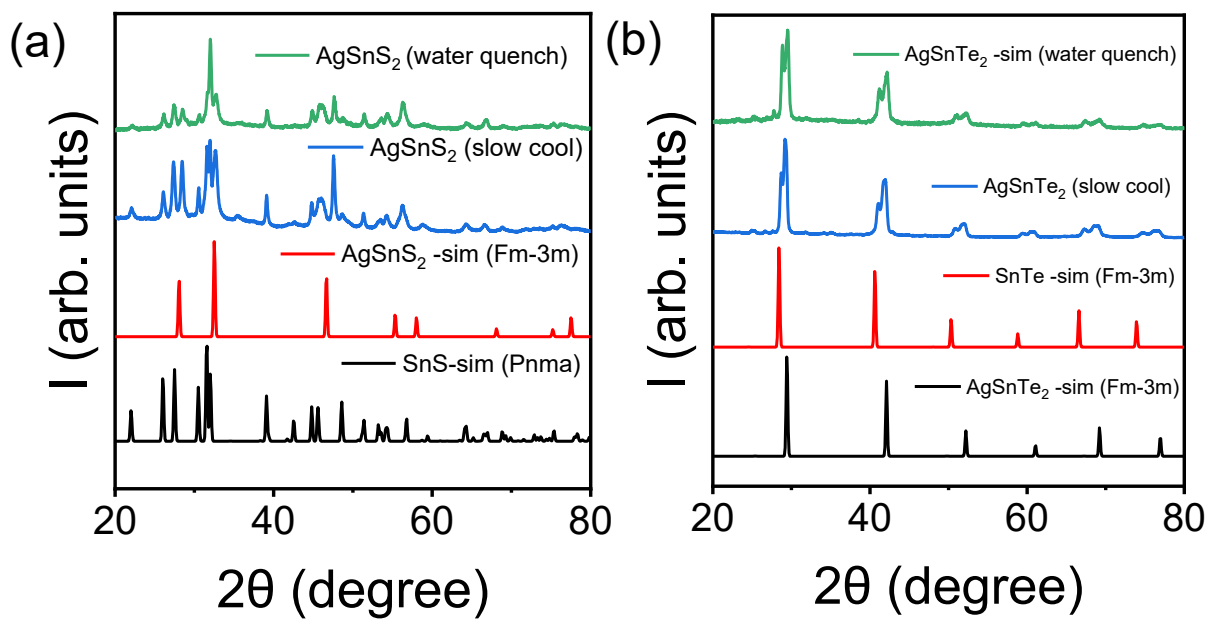

**Figure S3.** Powder X-ray diffraction data of  $\text{AgSnS}_2$  and  $\text{AgSnTe}_2$  recorded at room temperature. “slow cool” refers to samples cooled gradually from 850 °C, while “water quench” indicates quenching the sample from 850 °C directly into water to rapidly cool it.

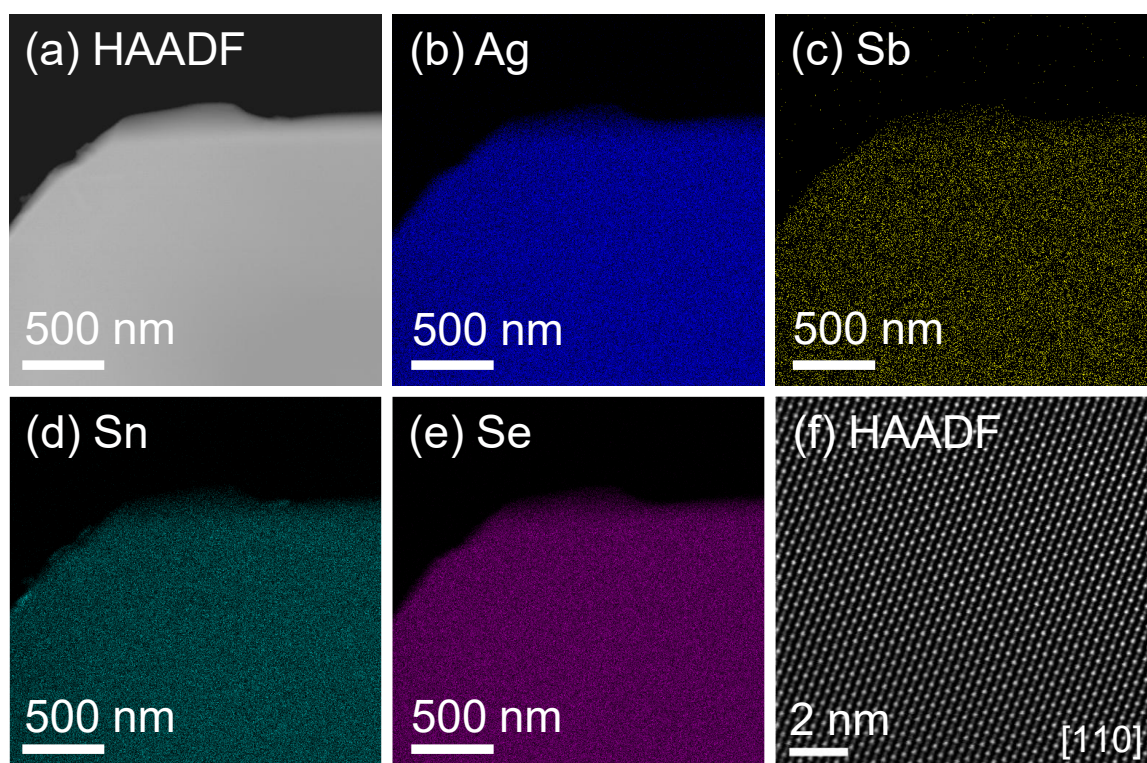

**Figure S4.** Scanning transmission electron microscopy (STEM) characterization of the  $\text{AgSn}_{0.5}\text{Sb}_{0.5}\text{Se}_2$  microstructure. (a) High-angle annular dark-field (HAADF) image. Energy-dispersive X-ray spectroscopy (EDS) elemental maps of (b) Ag, (c) Sb, (d) Sn, and (e) Se. (f) Atomic-resolution HAADF images acquired along the [110] zone.



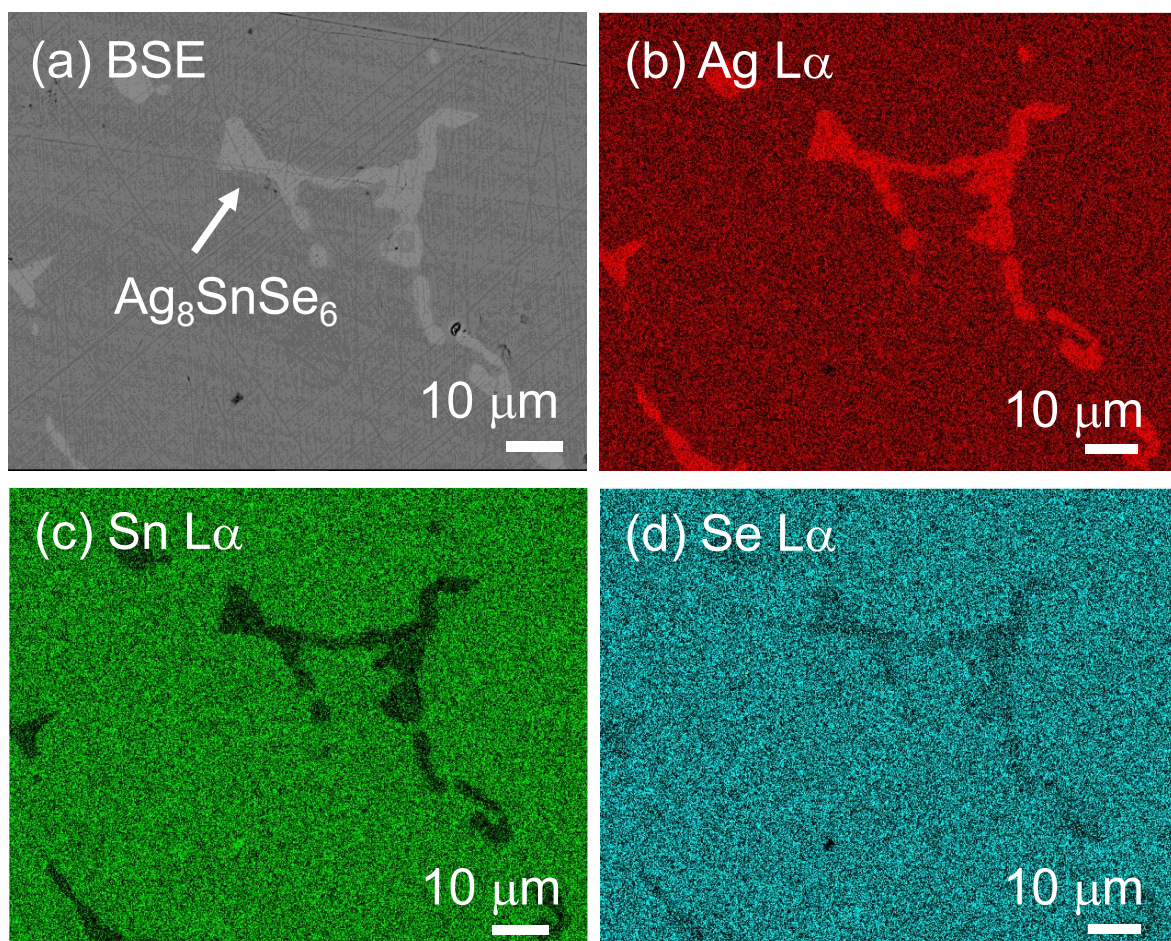

**Figure S5.** Scanning electron microscopy analysis on the microstructure of  $\text{AgSnSe}_2$ . (a) Backscattered electron (BSE) image. Energy dispersive spectroscopy map of (b) Ag, (c) Sn, and (d) Se.

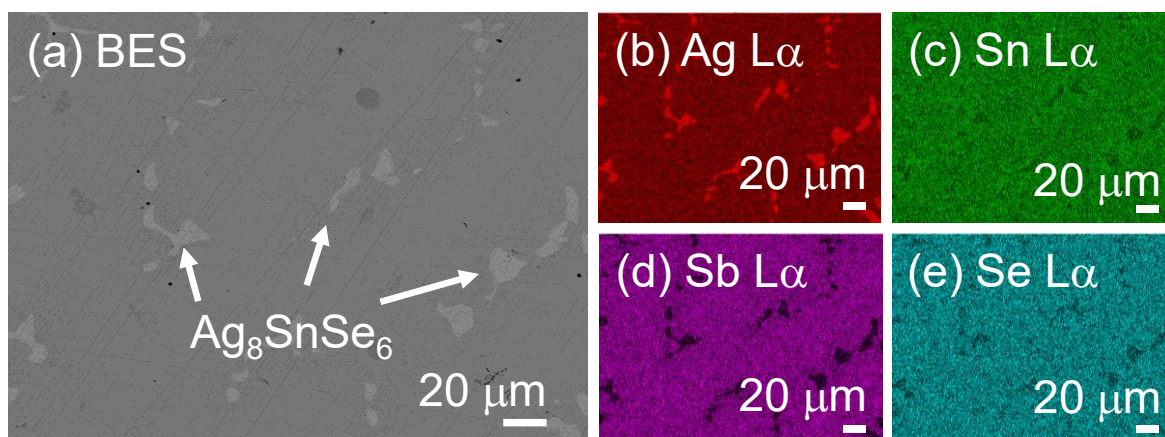

**Figure S6.** Scanning electron microscopy analysis on the microstructure of  $\text{AgSn}_{0.5}\text{Sb}_{0.5}\text{Se}_2$ . (a) Backscattered electron (BSE) image. Energy dispersive spectroscopy map of (b) Ag, (c) Sn, (d) Sb, and (e) Se.



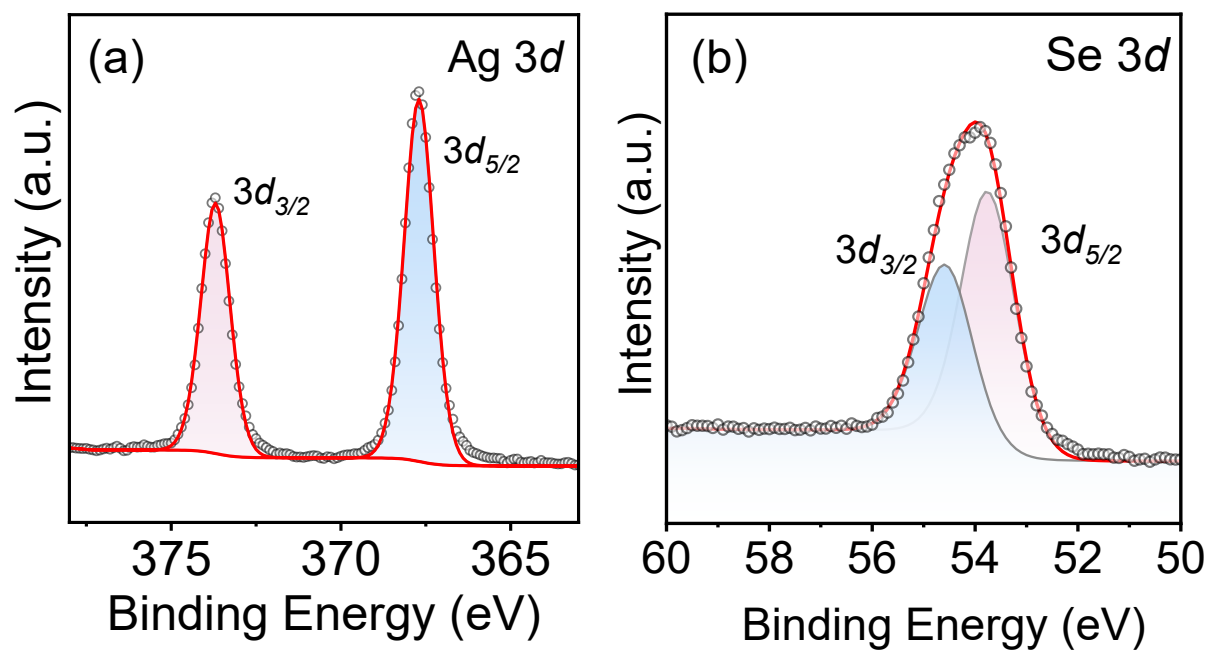

**Figure S7.** Photoemission spectra of (a) Ag 3d and (b) Se 3d for AgSnSe<sub>2</sub> measured with the photon energy of 1486.6 eV.

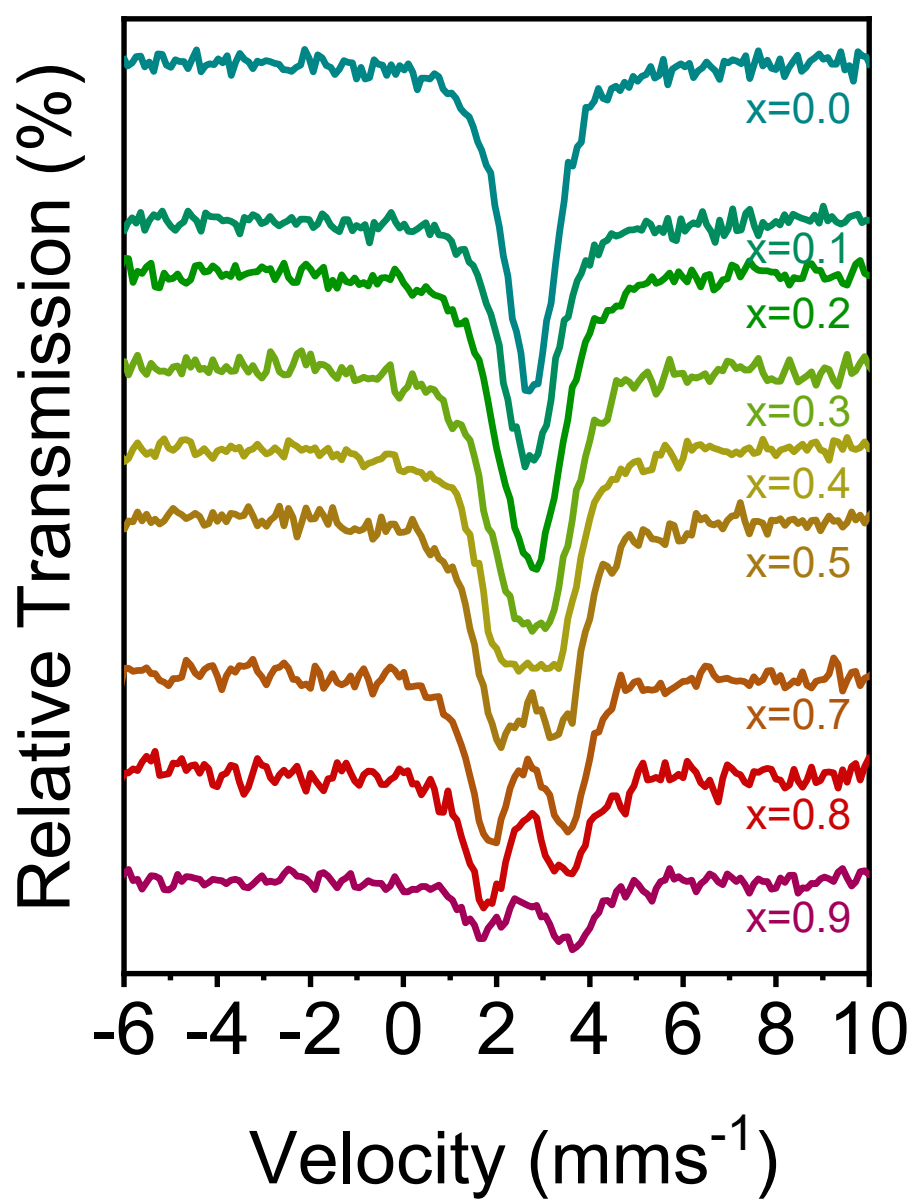

**Figure S8.** 80 K raw  $^{119}\text{Sn}$  Mössbauer spectra of  $\text{AgSn}_{1-x}\text{Sb}_x\text{Se}_2$ .

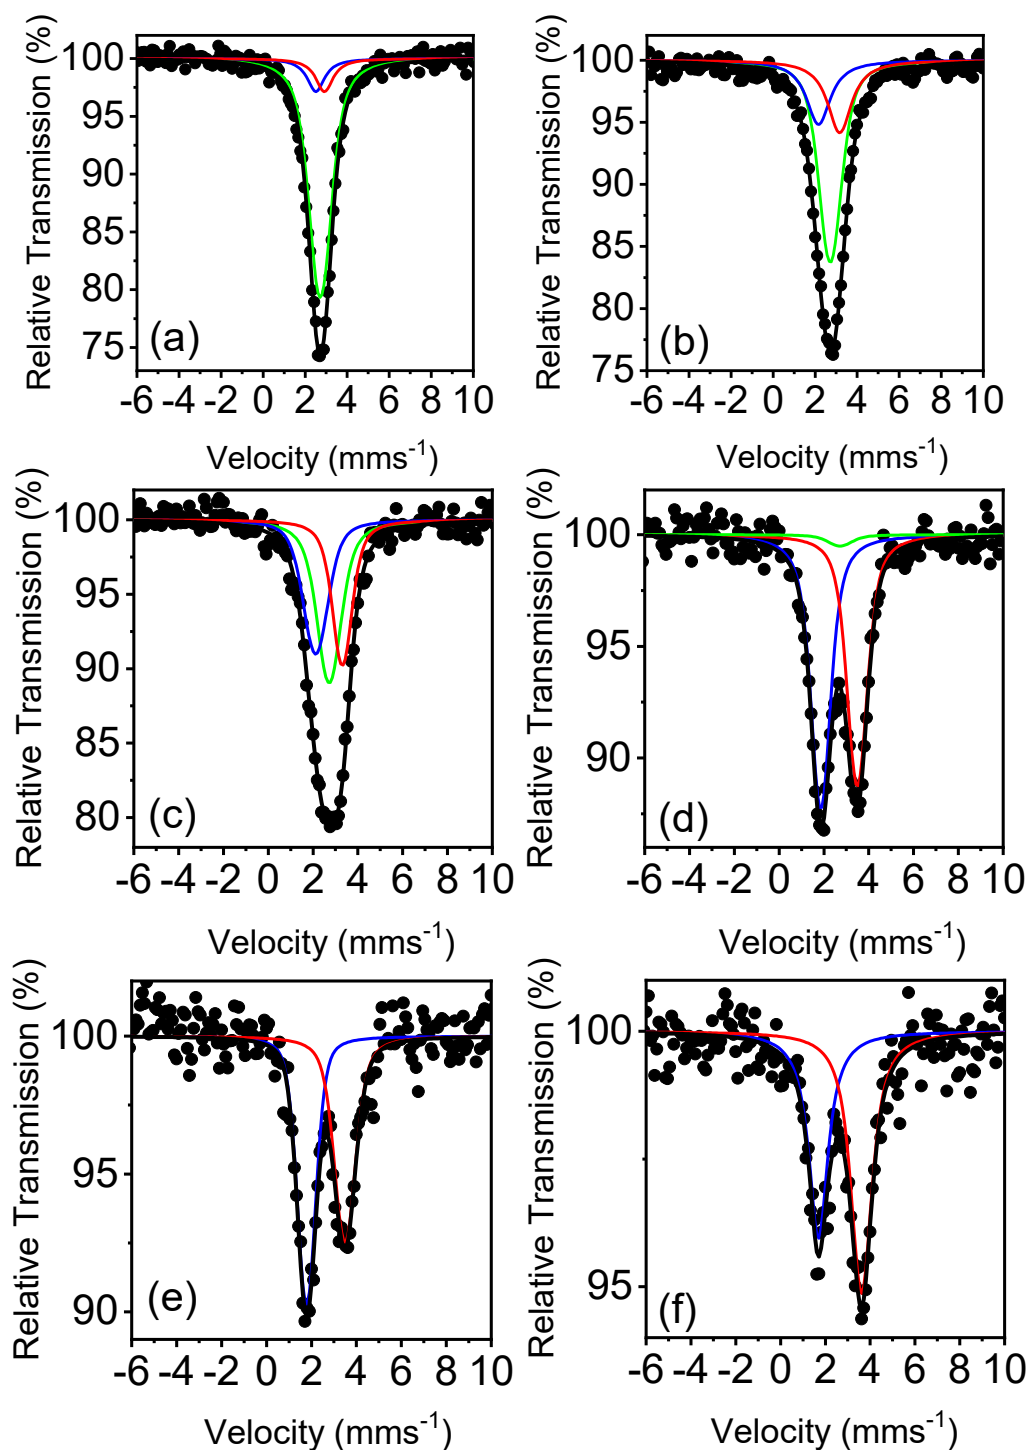

**Figure S9.** 80 K  $^{119}\text{Sn}$  Mössbauer spectra of  $\text{AgSn}_{1-x}\text{Sb}_x\text{Se}_2$ , (a)  $x = 0$  (three-component), (b)  $x = 0.2$ , (c)  $x = 0.3$ , (d)  $x = 0.7$ , (e)  $x = 0.8$ , (f)  $x = 0.9$ . The points correspond to the experimental data and the continuous lines to the components used to fit the spectra, blue for  $\text{Sn}^{4+}$ , green for  $\text{Sn}^{3+}$  and red for  $\text{Sn}^{2+}$ .

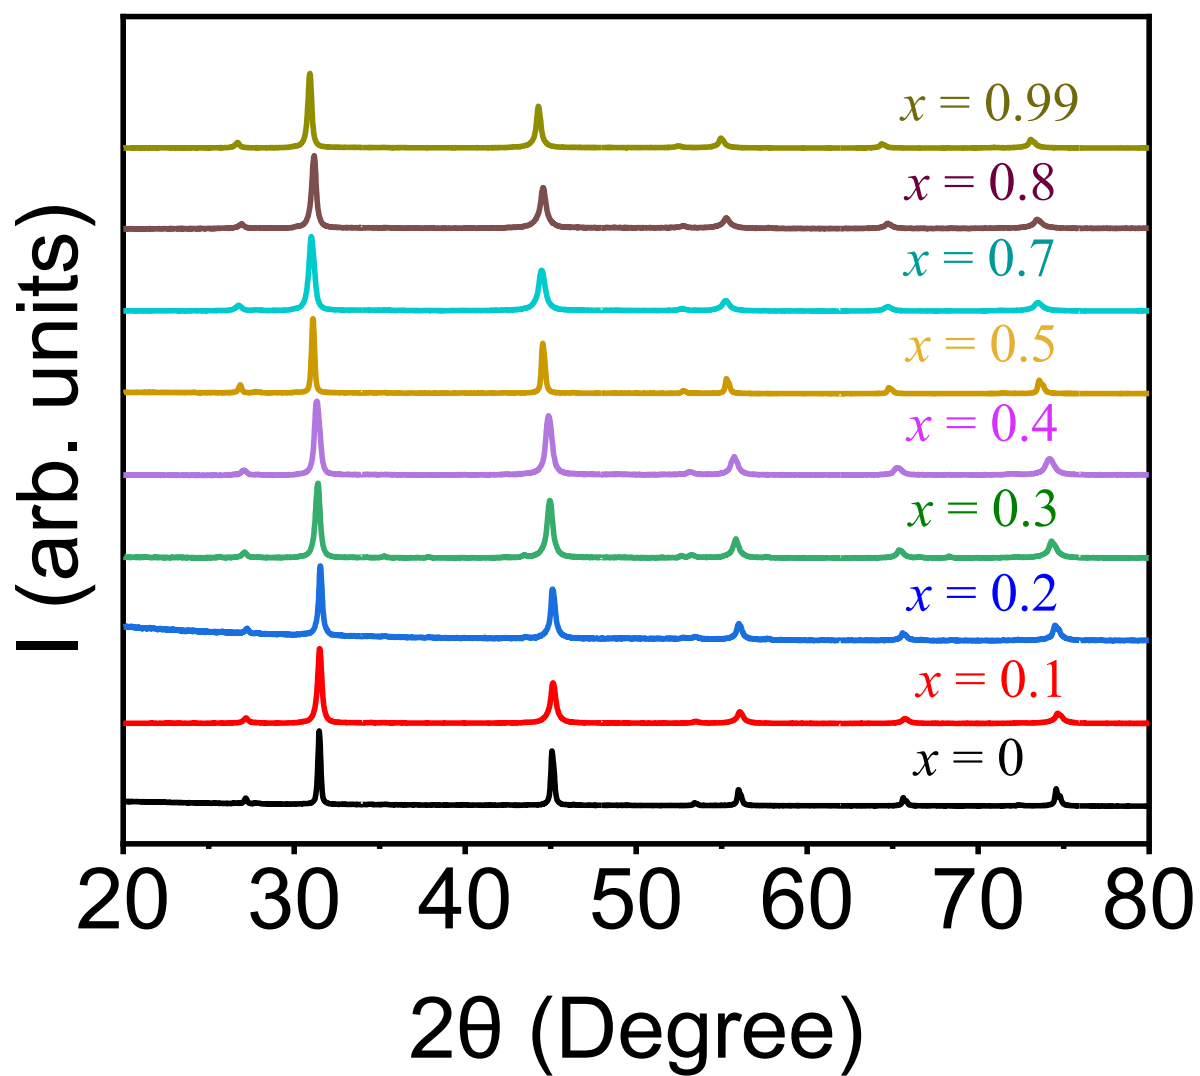

**Figure S10.** Room-temperature powder XRD patterns of  $\text{AgSn}_{1-x}\text{Sb}_x\text{Se}_2$  ( $x = 0 - 0.99$ ) samples.

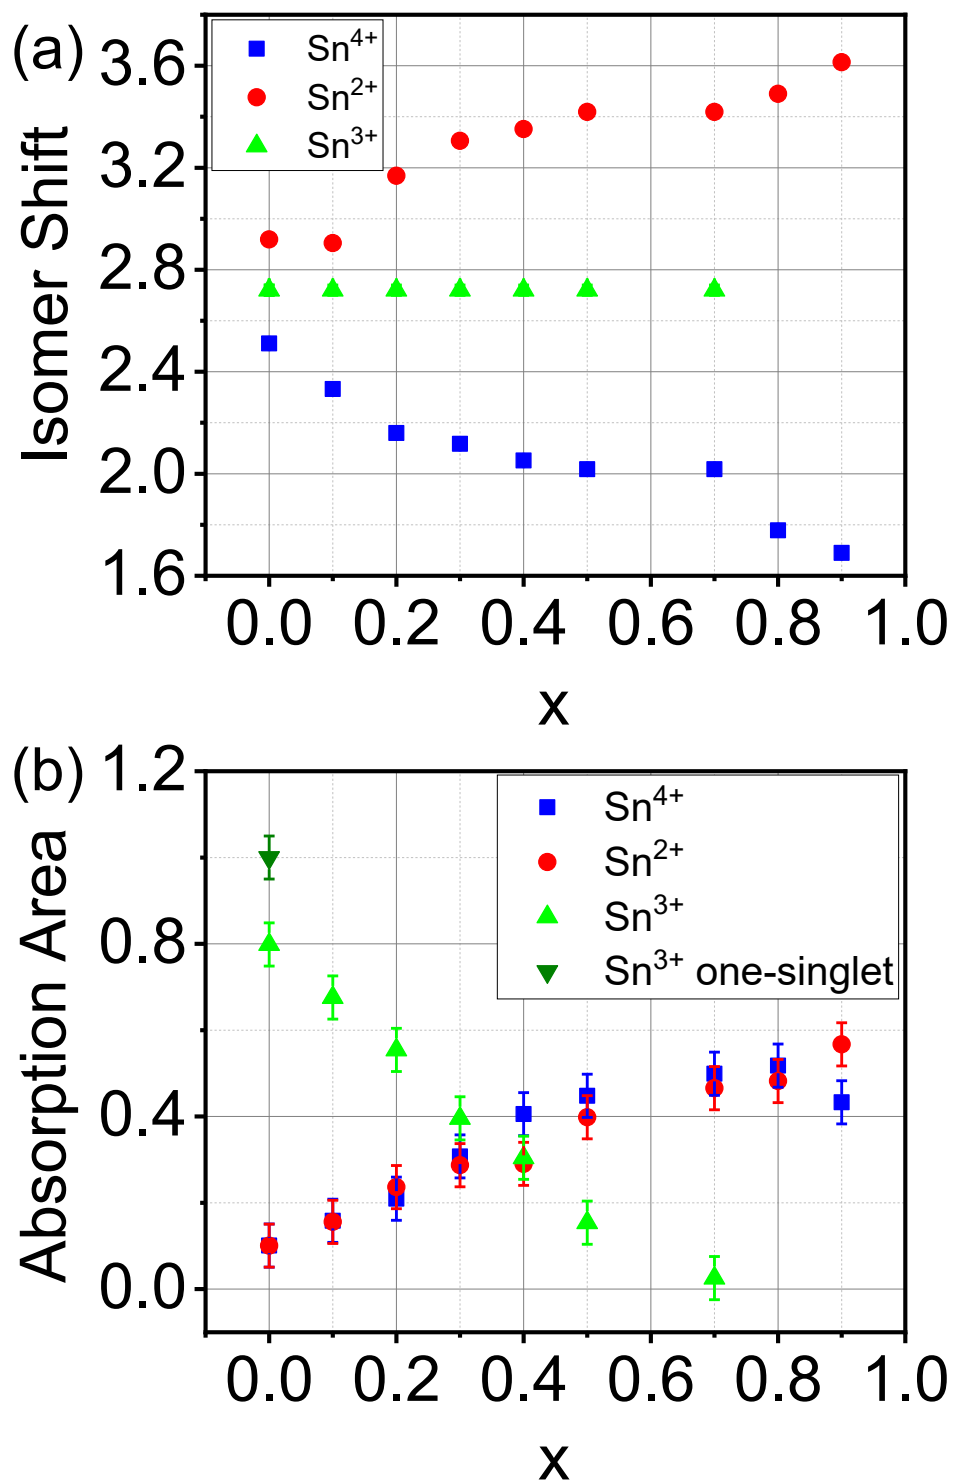

**Figure S11.** (a) Isomer shift and (b) absorption area of the components used to fit the 80 K  $^{119}\text{Sn}$  Mössbauer spectra of  $\text{AgSn}_{1-x}\text{Sb}_x\text{Se}_2$ .

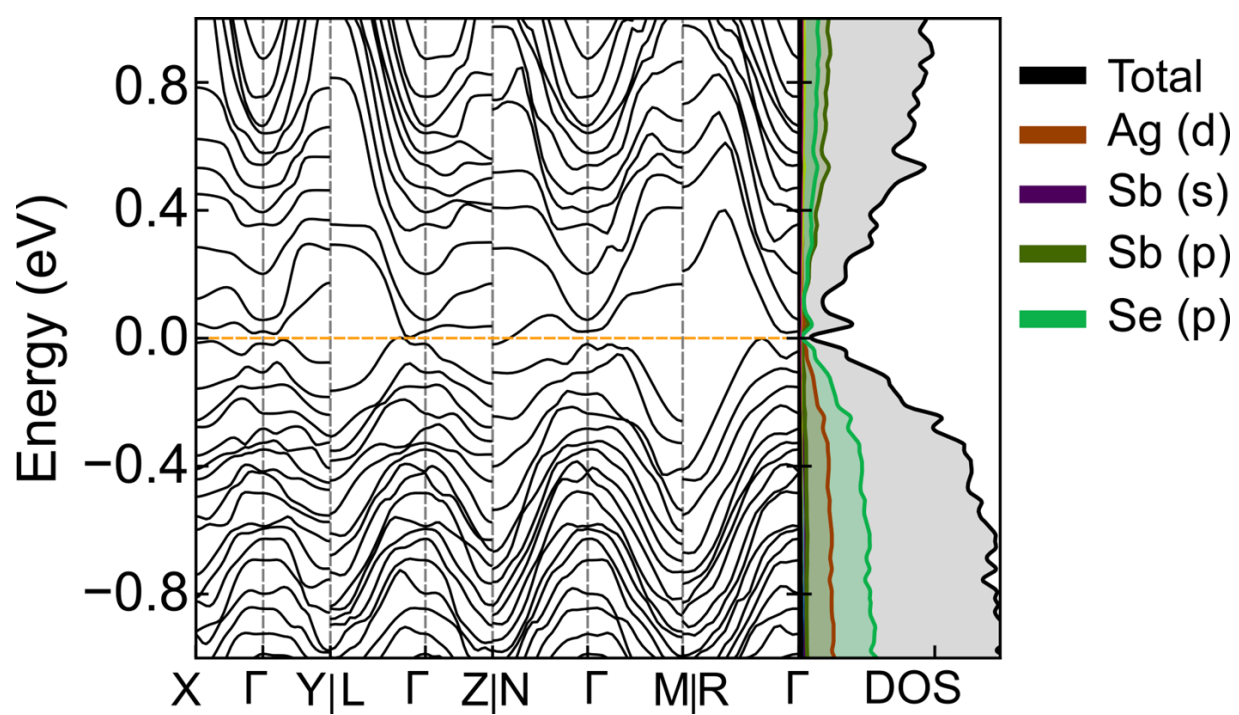

**Figure S12.** Electronic structures of AgSbSe<sub>2</sub>.

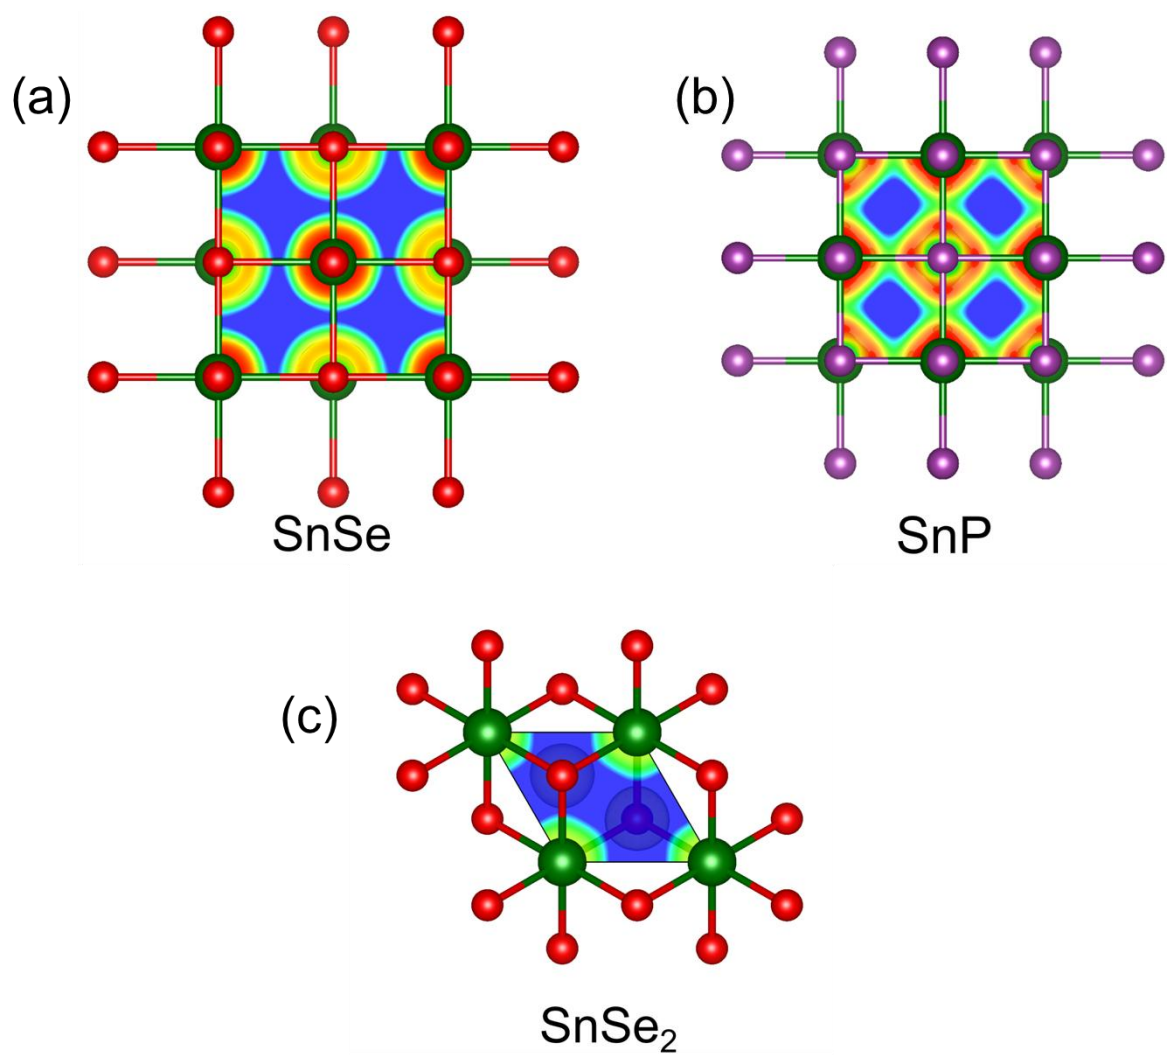

**Figure S13.** Electron localization function (ELF) visualized at an iso-surface value of 0.85 of the maximum charge density for (a) SnSe, (b) SnP and (c) SnSe<sub>2</sub>. Sn, Se and P atoms are denoted by the green, red, and violet spheres, respectively.

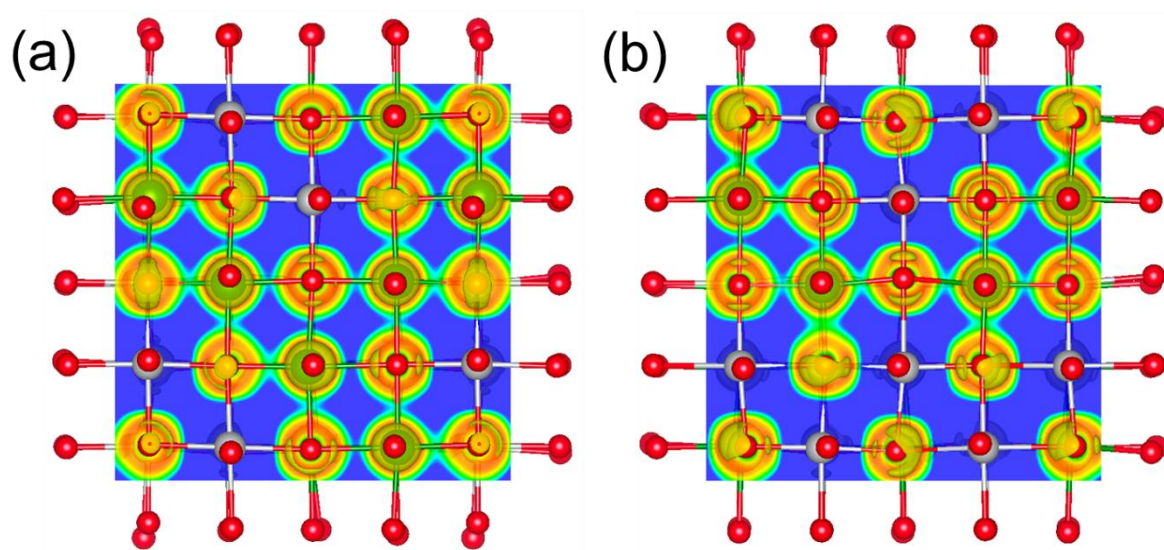

**Figure S14.** Electron localization function (ELF) visualized at an iso-surface value of 0.85 of the maximum charge density for AgSnSe<sub>2</sub> (a) along 001 direction and (b) 010 direction. Ag, Sn, and Se atoms are denoted by the grey, green, and red spheres, respectively.



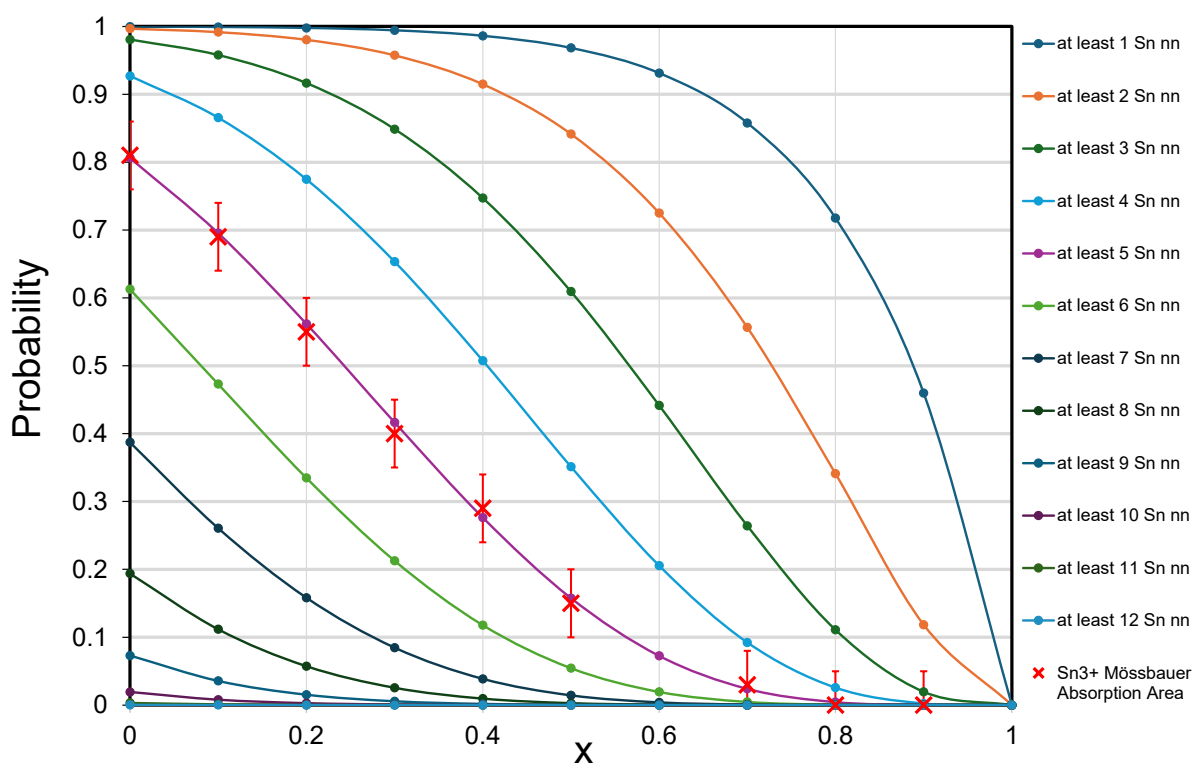

**Figure S15.** Plots of the total binomial probability of finding at least  $m$  and up to 12 first Sn cationic neighbors to a Sn site as a function of  $x$  in  $\text{AgSn}_{1-x}\text{Sb}_x\text{Se}_2$  (continuous line + symbol curves) together with the plot of the absorption area of the  $\text{Sn}^{3+}$  component resulting from the fits of the corresponding Mössbauer spectra (red x symbols with error bars).

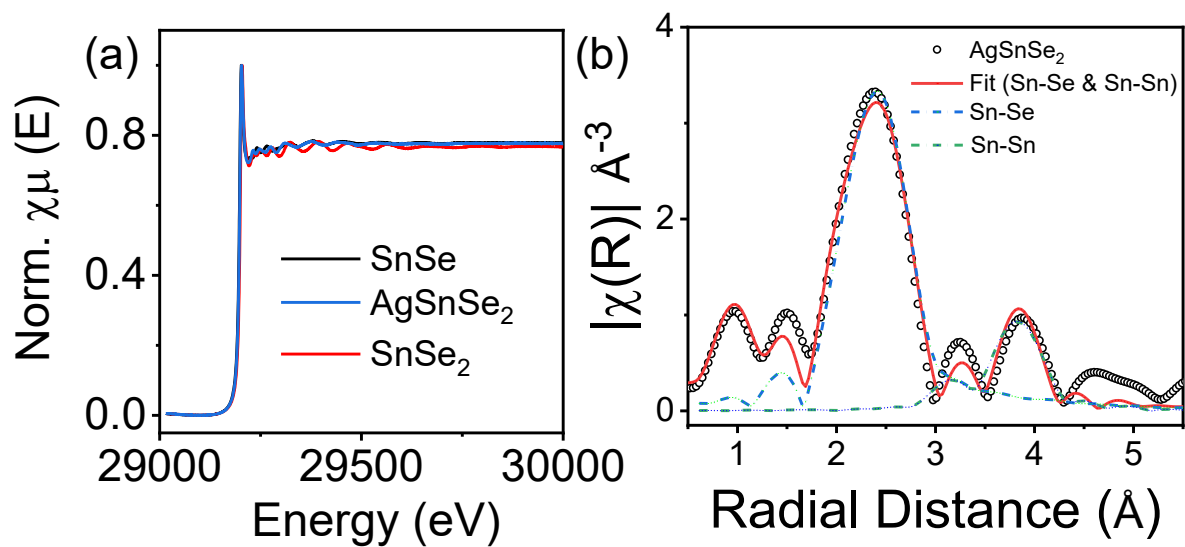

**Figure S16.** (a) Full-range Sn K-edge XANES spectra of SnSe, AgSnSe<sub>2</sub>, and SnSe<sub>2</sub> showing overall spectral features across the energy range. (b) Magnitude of Fourier-transformed Sn-K-edge EXAFS spectra (open symbols) and their best fit (solid line) for AgSnSe<sub>2</sub>. Dashed lines show their component fitting paths.

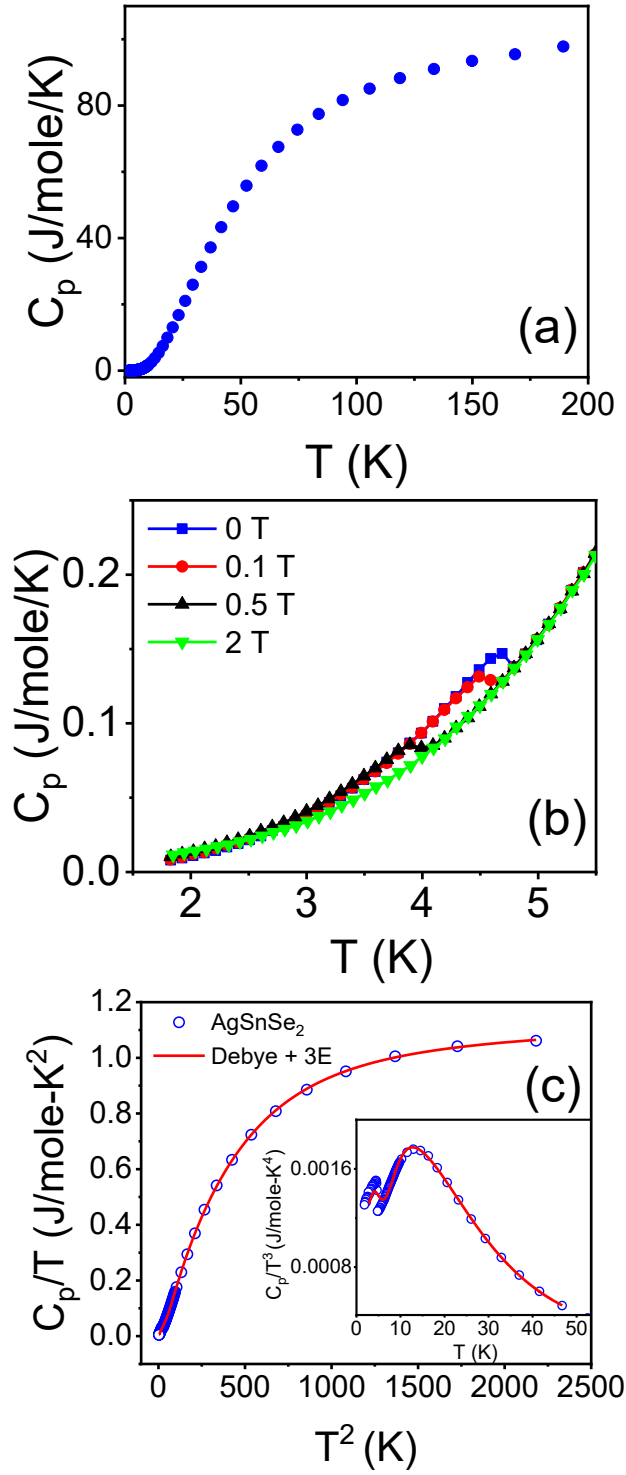

**Figure S17.** Heat capacity ( $C_p$ ) of  $\text{AgSnSe}_2$  of (a)  $C_p$  vs.  $T$ , and (b) enlarged view of the low-temperature region highlighting the magnetic field dependence. Low-temperature  $C_p/T$  versus  $T^2$  plot of  $\text{AgSnSe}_2$  and fit with Debye–Einstein model. Inset shows the  $C_p/T^3$  vs.  $T$  plot.

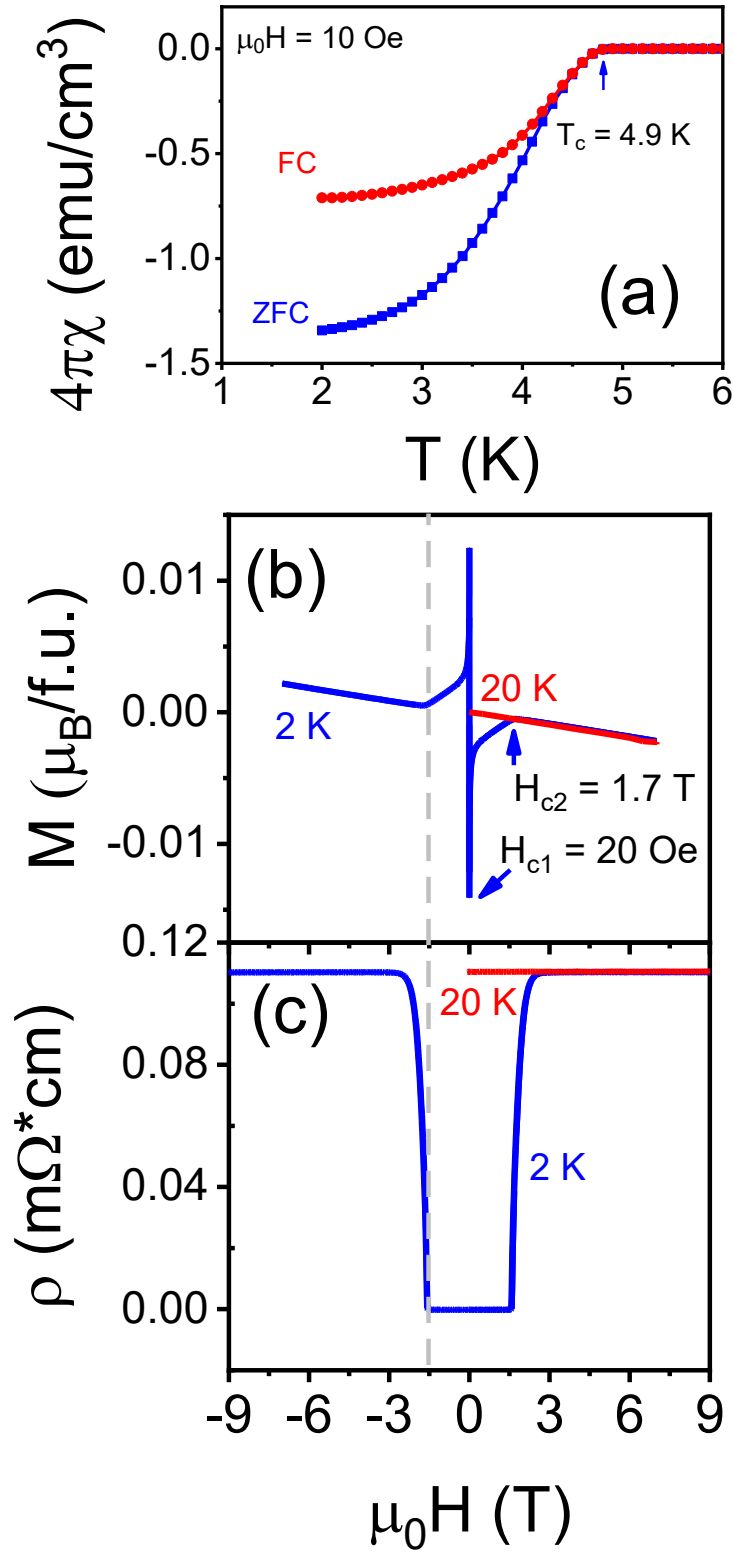

**Figure S18.** (a) Field-cooled (FC) and zero-field-cooled (ZFC) magnetic susceptibility, (b) the isothermal magnetization, and (c) magnetoresistance for AgSnSe<sub>2</sub>.

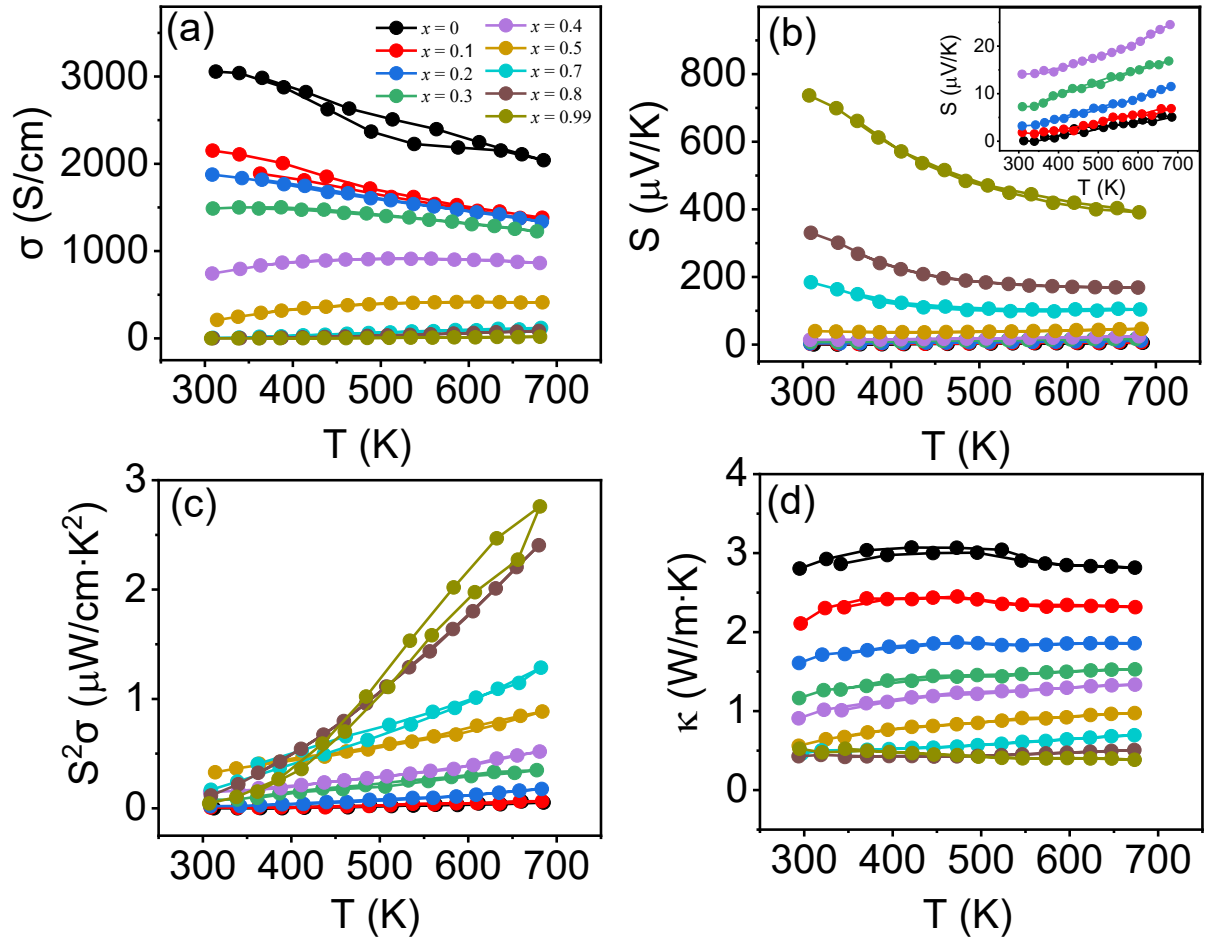

**Figure S19.** Temperature-dependent (a) electrical conductivity ( $\sigma$ ), (b) Seebeck coefficient ( $S$ ), (c) power factor ( $\sigma S^2$ ), and (d) total thermal conductivity,  $\kappa$  of  $\text{AgSn}_{1-x}\text{Sb}_x\text{Se}_2$  ( $x = 0-0.99$ ).

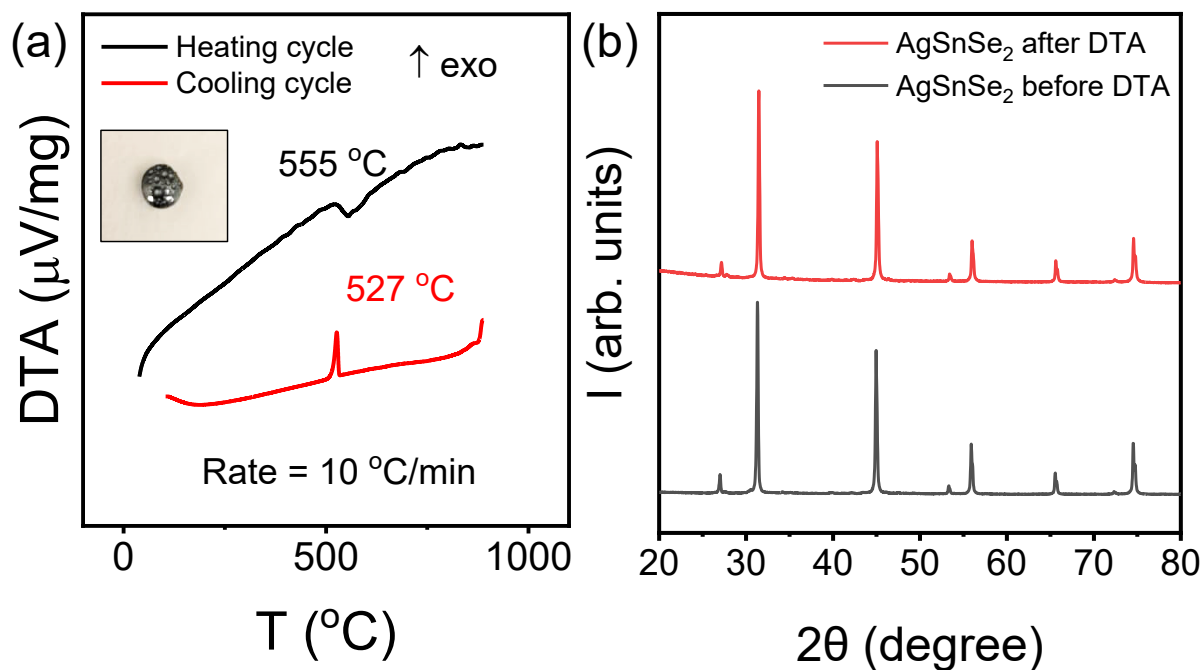

**Figure S20.** Differential thermal analysis (DTA) of (a)  $\text{AgSnSe}_2$  showing one endothermic event upon heating at  $555^{\circ}\text{C}$  and one exothermic (exo) event upon cooling at  $527^{\circ}\text{C}$ . Inset: Photograph of the sample after DTA, (b) PXRD taken before and after DTA shows that the material was fully recovered.

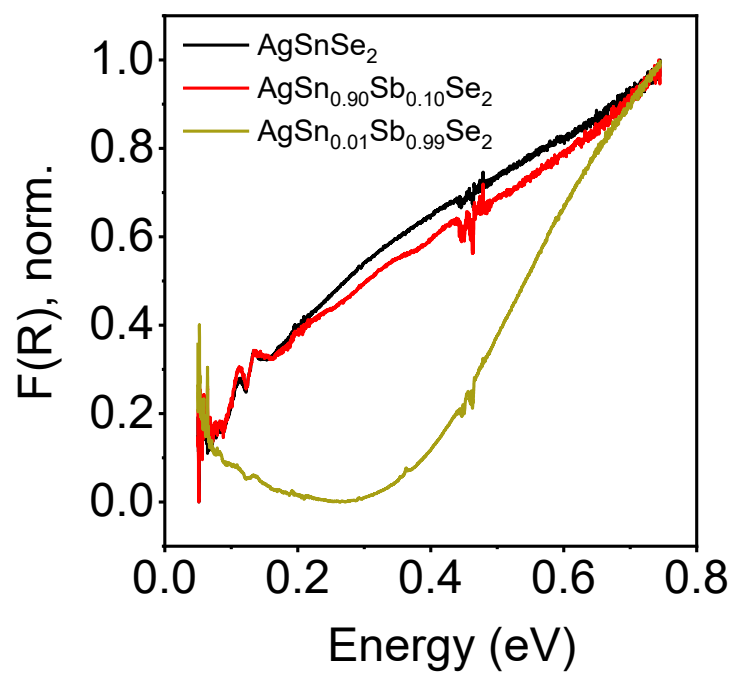

**Figure S21.** Optical absorption spectra of  $\text{AgSn}_{1-x}\text{Sb}_x\text{Se}_2$  ( $x = 0, 0.1$  and  $0.99$ ).

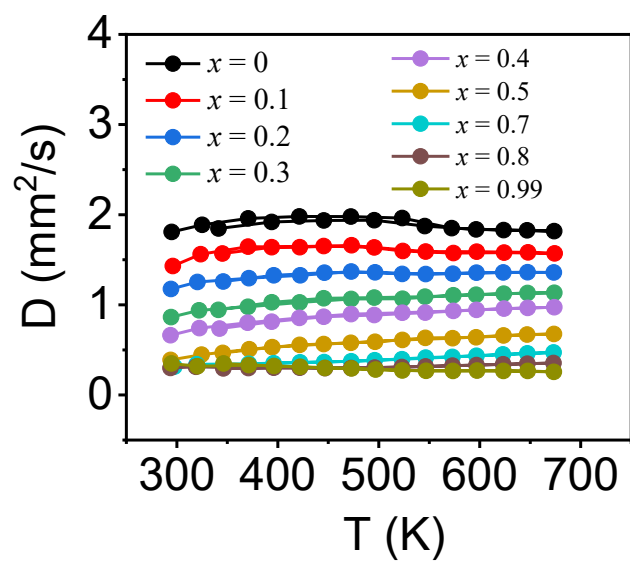

**Figure S22.** Temperature dependent diffusivity ( $D$ ) of  $\text{AgSn}_{1-x}\text{Sb}_x\text{Se}_2$  ( $x = 0\text{--}0.99$ ) samples.



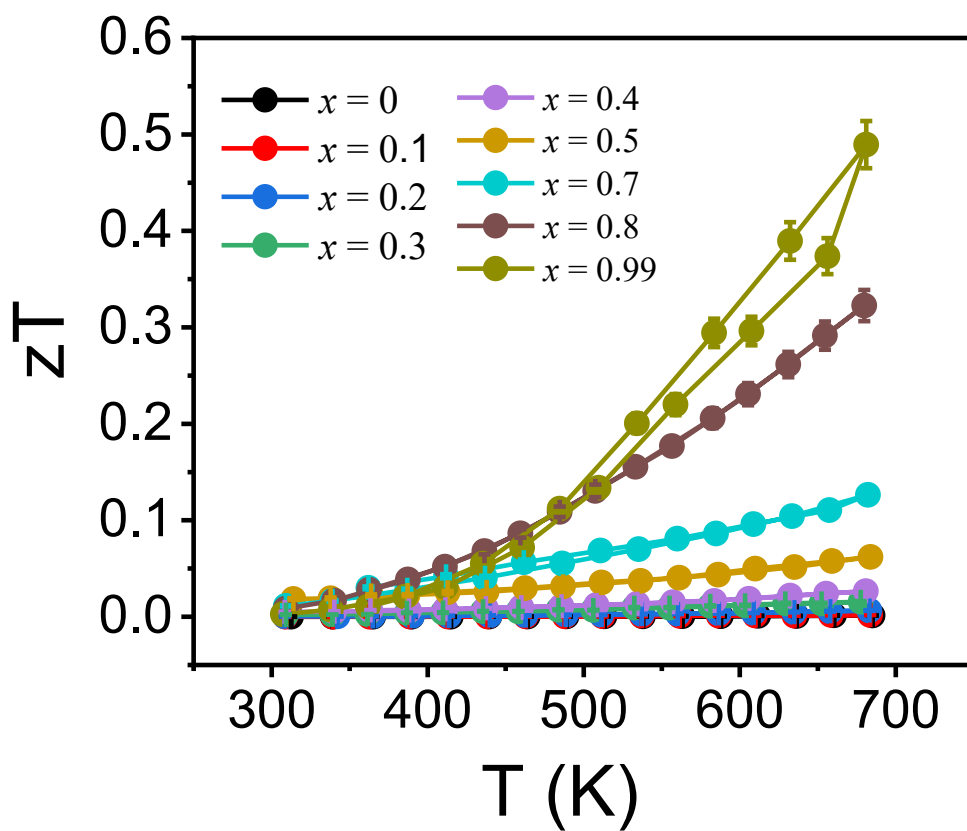

**Figure S23.** Thermoelectric figure of merit ( $zT$ ) of  $\text{AgSn}_{1-x}\text{Sb}_x\text{Se}_2$  ( $x = 0-0.99$ ) samples.

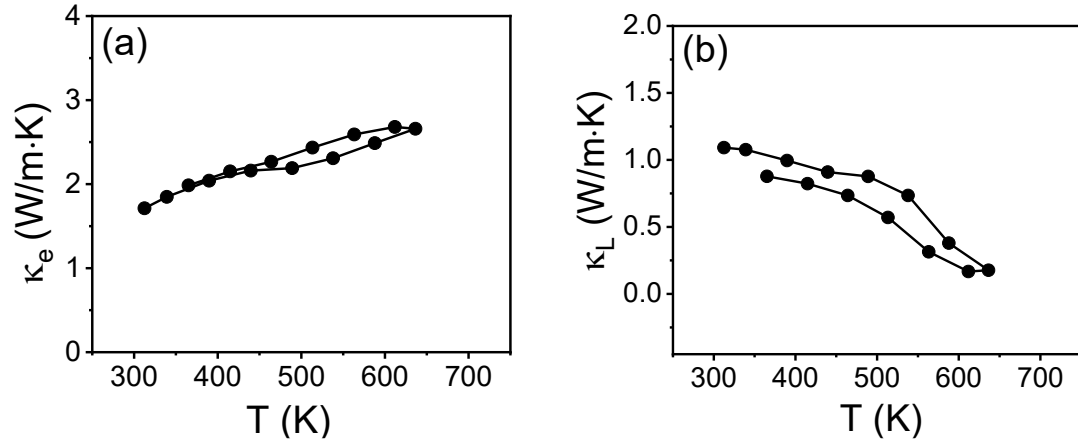

**Figure S24.** Temperature dependent electrical thermal conductivity ( $\kappa_e$ ) and lattice thermal conductivity ( $\kappa_L$ ), for AgSnSe<sub>2</sub> sample.

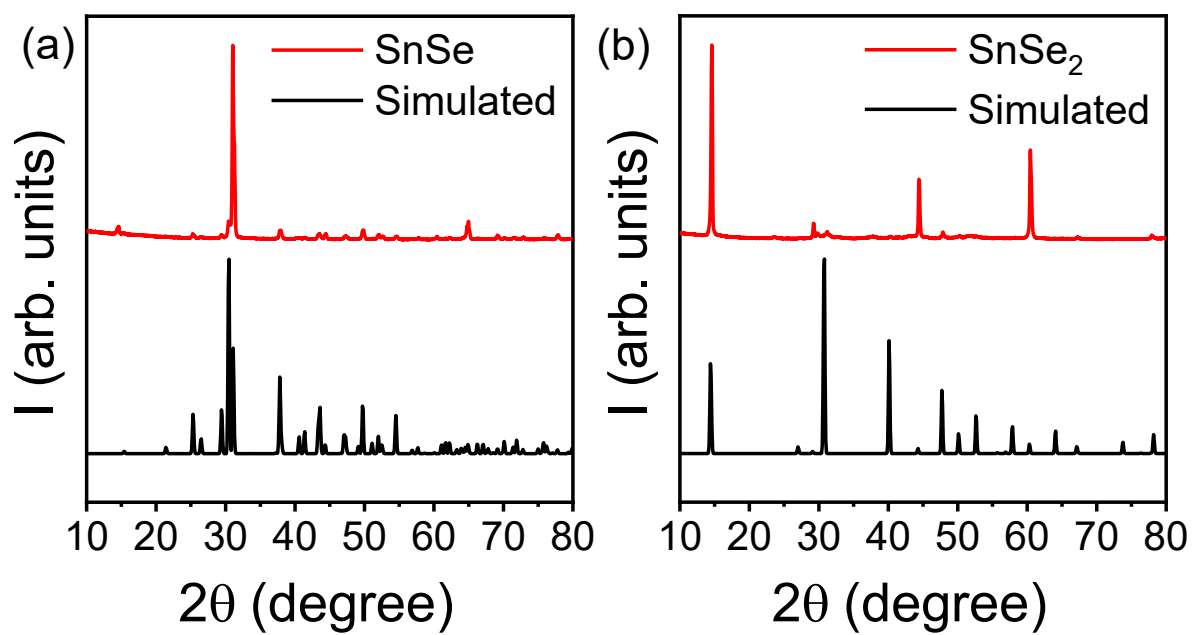

**Figure S25.** Room temperature powder X-ray diffraction pattern of (a)  $\text{SnSe}$  and (b)  $\text{SnSe}_2$ .

**Table S1.** Crystal data and structure refinement for AgSnSe<sub>2</sub> at 296.7(6) K.

|                                                                                                                                                                                                                     |                                                                                  |
|---------------------------------------------------------------------------------------------------------------------------------------------------------------------------------------------------------------------|----------------------------------------------------------------------------------|
| Empirical formula                                                                                                                                                                                                   | Ag Sn Se <sub>2</sub>                                                            |
| Formula weight                                                                                                                                                                                                      | 384.48                                                                           |
| Temperature                                                                                                                                                                                                         | 296.7(6) K                                                                       |
| Wavelength                                                                                                                                                                                                          | 0.71073 Å                                                                        |
| Crystal system                                                                                                                                                                                                      | Cubic                                                                            |
| Space group                                                                                                                                                                                                         | <i>Fm-3m</i>                                                                     |
| Unit cell dimensions                                                                                                                                                                                                | a = 5.6827(2) Å, α = 90°<br>b = 5.6827(2) Å, β = 90°<br>c = 5.6827(2) Å, γ = 90° |
| Volume                                                                                                                                                                                                              | 183.512(19) Å <sup>3</sup>                                                       |
| Z                                                                                                                                                                                                                   | 2                                                                                |
| Density (calculated)                                                                                                                                                                                                | 6.958 g/cm <sup>3</sup>                                                          |
| Absorption coefficient                                                                                                                                                                                              | 31.704 mm <sup>-1</sup>                                                          |
| F(000)                                                                                                                                                                                                              | 330                                                                              |
| Crystal size                                                                                                                                                                                                        | 0.124 x 0.124 x 0.031 mm <sup>3</sup>                                            |
| θ range for data collection                                                                                                                                                                                         | 6.218 to 33.036°                                                                 |
| Index ranges                                                                                                                                                                                                        | -8 ≤ h ≤ 7, -8 ≤ k ≤ 5, -7 ≤ l ≤ 8                                               |
| Reflections collected                                                                                                                                                                                               | 389                                                                              |
| Independent reflections                                                                                                                                                                                             | 33 [R <sub>int</sub> = 0.0478]                                                   |
| Completeness to θ = 25.242°                                                                                                                                                                                         | 100%                                                                             |
| Refinement method                                                                                                                                                                                                   | Full-matrix least-squares on F <sup>2</sup>                                      |
| Data / restraints / parameters                                                                                                                                                                                      | 33 / 0 / 4                                                                       |
| Goodness-of-fit                                                                                                                                                                                                     | 1.081                                                                            |
| Final R indices [I > 2σ(I)]                                                                                                                                                                                         | R <sub>obs</sub> = 0.0097, wR <sub>obs</sub> = 0.0249                            |
| R indices [all data]                                                                                                                                                                                                | R <sub>all</sub> = 0.0097, wR <sub>all</sub> = 0.0249                            |
| Extinction coefficient                                                                                                                                                                                              | 0.0232(17)                                                                       |
| Largest diff. peak and hole                                                                                                                                                                                         | 0.510 and -0.559 e·Å <sup>-3</sup>                                               |
| $R = \frac{\sum   F_o  -  F_c  }{\sum  F_o }$ , $wR = \left\{ \frac{\sum [w( F_o ^2 -  F_c ^2)^2]}{\sum [w( F_o ^4)]} \right\}^{1/2}$ and $w = 1/[\sigma^2(F_o^2) + (0.0185P)^2]$<br>where $P = (F_o^2 + 2F_c^2)/3$ |                                                                                  |

**Table S2.** Atomic coordinates ( $\times 10^4$ ) and equivalent isotropic displacement parameters ( $\text{\AA}^2 \times 10^3$ ) for AgSnSe<sub>2</sub> at 296.7(6) K with estimated standard deviations in parentheses.

| Label | x    | y     | z    | Occupancy | $U_{\text{eq}}^*$ |
|-------|------|-------|------|-----------|-------------------|
| Se(1) | 5000 | 10000 | 0    | 1         | 16(1)             |
| Sn(1) | 0    | 5000  | 5000 | 0.5002    | 18(1)             |
| Ag(1) | 0    | 5000  | 5000 | 0.5002    | 18(1)             |

\* $U_{\text{eq}}$  is defined as one third of the trace of the orthogonalized  $U_{ij}$  tensor.

**Table S3.** Anisotropic displacement parameters ( $\text{\AA}^2 \times 10^3$ ) for Ag Se<sub>2</sub> Sn at 296.7(6) K with estimated standard deviations in parentheses.

| Label | $U_{11}$ | $U_{22}$ | $U_{33}$ | $U_{12}$ | $U_{13}$ | $U_{23}$ |
|-------|----------|----------|----------|----------|----------|----------|
| Se(1) | 16(1)    | 16(1)    | 16(1)    | 0        | 0        | 0        |
| Sn(1) | 18(1)    | 18(1)    | 18(1)    | 0        | 0        | 0        |
| Ag(1) | 18(1)    | 18(1)    | 18(1)    | 0        | 0        | 0        |

The anisotropic displacement factor exponent takes the form:  $-2\pi^2[h^2a^{*2}U_{11} + \dots + 2hka^*b^*U_{12}]$ .

**Table S4.** Bond lengths [ $\text{\AA}$ ] for AgSnSe<sub>2</sub> at 296.7(6) K with estimated standard deviations in parentheses.

| Label       | Distances   |
|-------------|-------------|
| Se(1)-Sn(1) | 2.84135(10) |
| Se(1)-Ag(1) | 2.84135(10) |

**Table S5.** Crystal data and structure refinement for AgSb<sub>0.50</sub>Sn<sub>0.50</sub>Se<sub>2</sub> at 295.6(5) K.

|                                |                                                                                        |
|--------------------------------|----------------------------------------------------------------------------------------|
| Empirical formula              | AgSb <sub>0.50</sub> Sn <sub>0.50</sub> Se <sub>2</sub>                                |
| Formula weight                 | 386.01                                                                                 |
| Temperature                    | 295.6(5) K                                                                             |
| Wavelength                     | 0.71073 Å                                                                              |
| Crystal system                 | Cubic                                                                                  |
| Space group                    | <i>Fm-3m</i>                                                                           |
| Unit cell dimensions           | a = 5.74720(10) Å, α = 90°<br>b = 5.74720(10) Å, β = 90°<br>c = 5.74720(10) Å, γ = 90° |
| Volume                         | 189.832(10) Å <sup>3</sup>                                                             |
| Z                              | 2                                                                                      |
| Density (calculated)           | 6.753 g/cm <sup>3</sup>                                                                |
| Absorption coefficient         | 30.917 mm <sup>-1</sup>                                                                |
| F(000)                         | 331                                                                                    |
| Crystal size                   | 0.06 x 0.05 x 0.04 mm <sup>3</sup>                                                     |
| θ range for data collection    | 6.148 to 37.968°                                                                       |
| Index ranges                   | -9 ≤ h ≤ 9, -9 ≤ k ≤ 9, -9 ≤ l ≤ 9                                                     |
| Reflections collected          | 707                                                                                    |
| Independent reflections        | 42 [R <sub>int</sub> = 0.0194]                                                         |
| Completeness to θ = 25.242°    | 100%                                                                                   |
| Refinement method              | Full-matrix least-squares on F <sup>2</sup>                                            |
| Data / restraints / parameters | 42 / 0 / 4                                                                             |
| Goodness-of-fit                | 1.353                                                                                  |
| Final R indices [I > 2σ(I)]    | R <sub>obs</sub> = 0.0122, wR <sub>obs</sub> = 0.0310                                  |
| R indices [all data]           | R <sub>all</sub> = 0.0122, wR <sub>all</sub> = 0.0310                                  |
| Extinction coefficient         | 0.0076(9)                                                                              |
| Largest diff. peak and hole    | 0.941 and -0.408 e·Å <sup>-3</sup>                                                     |

$R = \sum ||F_o| - |F_c|| / \sum |F_o|$ ,  $wR = \{ \sum [w(|F_o|^2 - |F_c|^2)^2] / \sum [w(|F_o|^4)] \}^{1/2}$  and  
 $w = 1 / [\sigma^2(F_o^2) + (0.0130P)^2 + 0.6593P]$  where  $P = (F_o^2 + 2F_c^2) / 3$

**Table S6.** Atomic coordinates ( $\times 10^4$ ) and equivalent isotropic displacement parameters ( $\text{\AA}^2 \times 10^3$ ) for  $\text{AgSb}_{0.50}\text{Sn}_{0.50}\text{Se}_2$  at 295.6(5) K with estimated standard deviations in parentheses.

| Label | x     | y    | z    | Occupancy | $U_{\text{eq}}^*$ |
|-------|-------|------|------|-----------|-------------------|
| Ag(1) | 10000 | 5000 | 5000 | 0.5002    | 26(1)             |
| Se(1) | 5000  | 5000 | 5000 | 1         | 28(1)             |
| Sn(1) | 10000 | 5000 | 5000 | 0.2501    | 26(1)             |
| Sb(1) | 10000 | 5000 | 5000 | 0.2501    | 26(1)             |

\* $U_{\text{eq}}$  is defined as one third of the trace of the orthogonalized  $U_{ij}$  tensor.

**Table S7.** Anisotropic displacement parameters ( $\text{\AA}^2 \times 10^3$ ) for  $\text{AgSb}_{0.50}\text{Sn}_{0.50}\text{Se}_2$  at 295.6(5) K with estimated standard deviations in parentheses.

| Label | $U_{11}$ | $U_{22}$ | $U_{33}$ | $U_{12}$ | $U_{13}$ | $U_{23}$ |
|-------|----------|----------|----------|----------|----------|----------|
| Ag(1) | 26(1)    | 26(1)    | 26(1)    | 0        | 0        | 0        |
| Se(1) | 28(1)    | 28(1)    | 28(1)    | 0        | 0        | 0        |
| Sn(1) | 26(1)    | 26(1)    | 26(1)    | 0        | 0        | 0        |
| Sb(1) | 26(1)    | 26(1)    | 26(1)    | 0        | 0        | 0        |

The anisotropic displacement factor exponent takes the form:  $-2\pi^2[h^2a^{*2}U_{11} + \dots + 2hka^*b^*U_{12}]$ .

**Table S8.** Bond lengths [ $\text{\AA}$ ] for  $\text{AgSb}_{0.50}\text{Sn}_{0.50}\text{Se}_2$  at 295.6(5) K with estimated standard deviations in parentheses.

| Label       | Distances  |
|-------------|------------|
| Ag(1)-Se(1) | 2.87360(5) |

**Table S9.** Fitting parameters for the Sn 3d, Ag 3d and Se 3d XPS spectra of AgSnSe<sub>2</sub> BE<sub>5/2</sub> = binding energy of 3d<sub>5/2</sub>, FWHM fit parameter is full width at half maximum, L/G Mix(%) Product is Lorentzian/Gaussian Mix Product.

| <b>Orbital (3d)</b> | <b>BE<sub>5/2</sub> (eV)</b> | <b>FWHM fit parameter (eV)</b> | <b>L/G Mix (%) Product</b> |
|---------------------|------------------------------|--------------------------------|----------------------------|
| Ag                  | 367.86                       | 1.07                           | 30                         |
| Sn                  | 486.03                       | 1.56                           | 30                         |
| Se                  | 53.75                        | 1.29                           | 30                         |



**Table S10.** Mössbauer hyperfine parameters as resulting from the best fits of the corresponding spectra of the  $\text{AgSn}_{1-x}\text{Sb}_x\text{Se}_2$  ( $x = 0-0.9$ ) samples recorded at 80 K. IS is the isomer shift relative to  $\text{SnO}_2$  at 300 K,  $\Gamma/2$  is the half line-width and AA is the relative spectral absorption area of each component used to fit the spectra. Typical errors are  $\pm 0.02$  mm/s for IS and  $\Gamma/2$  and  $\pm 5\%$  for Area. The values for the  $x=0$  sample are given for both the one-component and three-components fits.

|     |  | IS               |                  |                  |  | $\Gamma/2$       |                  |                  |  | AA               |                  |                  |
|-----|--|------------------|------------------|------------------|--|------------------|------------------|------------------|--|------------------|------------------|------------------|
| x   |  | $\text{Sn}^{4+}$ | $\text{Sn}^{2+}$ | $\text{Sn}^{3+}$ |  | $\text{Sn}^{4+}$ | $\text{Sn}^{2+}$ | $\text{Sn}^{3+}$ |  | $\text{Sn}^{4+}$ | $\text{Sn}^{2+}$ | $\text{Sn}^{3+}$ |
| 0   |  |                  |                  | 2.72             |  |                  |                  | 0.58             |  |                  |                  | 1.00             |
| 0   |  | 2.51             | 2.92             | 2.72             |  | 0.51             | 0.51             | 0.58             |  | 0.10             | 0.10             | 0.80             |
| 0.1 |  | 2.33             | 2.90             | 2.72             |  | 0.63             | 0.63             | 0.58             |  | 0.16             | 0.16             | 0.68             |
| 0.2 |  | 2.16             | 3.17             | 2.72             |  | 0.69             | 0.69             | 0.58             |  | 0.21             | 0.24             | 0.55             |
| 0.3 |  | 2.12             | 3.31             | 2.72             |  | 0.58             | 0.49             | 0.58             |  | 0.31             | 0.29             | 0.40             |
| 0.4 |  | 2.05             | 3.35             | 2.72             |  | 0.55             | 0.46             | 0.58             |  | 0.41             | 0.29             | 0.30             |
| 0.5 |  | 2.02             | 3.42             | 2.72             |  | 0.52             | 0.49             | 0.59             |  | 0.45             | 0.40             | 0.15             |
| 0.7 |  | 2.02             | 3.42             | 2.72             |  | 0.52             | 0.49             | 0.59             |  | 0.50             | 0.47             | 0.03             |
| 0.8 |  | 1.78             | 3.49             |                  |  | 0.42             | 0.49             |                  |  | 0.52             | 0.48             |                  |
| 0.9 |  | 1.69             | 3.61             |                  |  | 0.51             | 0.56             |                  |  | 0.43             | 0.57             |                  |

**Table S11.** Bader charge analysis of SnSe, AgSnSe<sub>2</sub> and SnSe<sub>2</sub>.

|                           | <b>Avg. Sn charge</b> | <b>Avg. Se charge</b> | <b>Avg. Ag charge</b> |
|---------------------------|-----------------------|-----------------------|-----------------------|
| <b>SnSe</b>               | 0.83                  | -0.83                 | -                     |
| <b>AgSnSe<sub>2</sub></b> | 0.95                  | -0.63                 | 0.31                  |
| <b>SnSe<sub>2</sub></b>   | 1.19                  | -0.59                 | -                     |

**Table S12.** Binomial probabilities of finding n out of 12 first Sn cationic neighbours to a Sn site, as a function of the Sb concentration x in  $\text{AgSn}_{1-x}\text{Sb}_x\text{Se}_2$ .

|            |       | <b>n</b> |       |       |       |       |       |       |       |       |       |       |       |
|------------|-------|----------|-------|-------|-------|-------|-------|-------|-------|-------|-------|-------|-------|
| <b>x</b>   | 0     | 1        | 2     | 3     | 4     | 5     | 6     | 7     | 8     | 9     | 10    | 11    | 12    |
| <b>0</b>   | 0.000 | 0.003    | 0.016 | 0.054 | 0.121 | 0.193 | 0.226 | 0.193 | 0.121 | 0.054 | 0.016 | 0.003 | 0.000 |
| <b>0.1</b> | 0.001 | 0.008    | 0.034 | 0.092 | 0.170 | 0.222 | 0.212 | 0.149 | 0.076 | 0.028 | 0.007 | 0.001 | 0.000 |
| <b>0.2</b> | 0.002 | 0.017    | 0.064 | 0.142 | 0.213 | 0.227 | 0.177 | 0.101 | 0.042 | 0.012 | 0.002 | 0.000 | 0.000 |
| <b>0.3</b> | 0.006 | 0.037    | 0.109 | 0.195 | 0.237 | 0.204 | 0.128 | 0.059 | 0.020 | 0.005 | 0.001 | 0.000 | 0.000 |
| <b>0.4</b> | 0.014 | 0.071    | 0.168 | 0.240 | 0.231 | 0.158 | 0.079 | 0.029 | 0.008 | 0.001 | 0.000 | 0.000 | 0.000 |
| <b>0.5</b> | 0.032 | 0.127    | 0.232 | 0.258 | 0.194 | 0.103 | 0.040 | 0.011 | 0.002 | 0.000 | 0.000 | 0.000 | 0.000 |
| <b>0.6</b> | 0.069 | 0.206    | 0.283 | 0.236 | 0.133 | 0.053 | 0.016 | 0.003 | 0.001 | 0.000 | 0.000 | 0.000 | 0.000 |
| <b>0.7</b> | 0.142 | 0.301    | 0.292 | 0.172 | 0.068 | 0.019 | 0.004 | 0.001 | 0.000 | 0.000 | 0.000 | 0.000 | 0.000 |
| <b>0.8</b> | 0.282 | 0.377    | 0.230 | 0.085 | 0.021 | 0.004 | 0.000 | 0.000 | 0.000 | 0.000 | 0.000 | 0.000 | 0.000 |
| <b>0.9</b> | 0.540 | 0.341    | 0.099 | 0.017 | 0.002 | 0.000 | 0.000 | 0.000 | 0.000 | 0.000 | 0.000 | 0.000 | 0.000 |
| <b>1</b>   | 1.000 | 0.000    | 0.000 | 0.000 | 0.000 | 0.000 | 0.000 | 0.000 | 0.000 | 0.000 | 0.000 | 0.000 | 0.000 |

**Table S13.** Total binomial probabilities of finding at least  $m$  and up to 12 first Sn cationic neighbours to a Sn site, as a function of the Sb concentration  $x$  in  $\text{AgSn}_{1-x}\text{Sb}_x\text{Se}_2$ .

|            | at least $m$ |       |       |       |       |       |       |       |       |       |       |       |
|------------|--------------|-------|-------|-------|-------|-------|-------|-------|-------|-------|-------|-------|
| $x$        | 1            | 2     | 3     | 4     | 5     | 6     | 7     | 8     | 9     | 10    | 11    | 12    |
| <b>0</b>   | 1.000        | 0.997 | 0.981 | 0.927 | 0.806 | 0.613 | 0.387 | 0.194 | 0.073 | 0.019 | 0.003 | 0.000 |
| <b>0.1</b> | 0.999        | 0.992 | 0.958 | 0.866 | 0.696 | 0.473 | 0.261 | 0.112 | 0.036 | 0.008 | 0.001 | 0.000 |
| <b>0.2</b> | 0.998        | 0.980 | 0.917 | 0.775 | 0.562 | 0.335 | 0.158 | 0.057 | 0.015 | 0.003 | 0.000 | 0.000 |
| <b>0.3</b> | 0.994        | 0.958 | 0.849 | 0.653 | 0.417 | 0.213 | 0.085 | 0.026 | 0.006 | 0.001 | 0.000 | 0.000 |
| <b>0.4</b> | 0.986        | 0.915 | 0.747 | 0.507 | 0.276 | 0.118 | 0.039 | 0.009 | 0.002 | 0.000 | 0.000 | 0.000 |
| <b>0.5</b> | 0.968        | 0.842 | 0.609 | 0.351 | 0.158 | 0.054 | 0.014 | 0.003 | 0.000 | 0.000 | 0.000 | 0.000 |
| <b>0.6</b> | 0.931        | 0.725 | 0.442 | 0.205 | 0.073 | 0.019 | 0.004 | 0.001 | 0.000 | 0.000 | 0.000 | 0.000 |
| <b>0.7</b> | 0.858        | 0.557 | 0.264 | 0.092 | 0.024 | 0.005 | 0.001 | 0.000 | 0.000 | 0.000 | 0.000 | 0.000 |
| <b>0.8</b> | 0.718        | 0.341 | 0.111 | 0.026 | 0.004 | 0.001 | 0.000 | 0.000 | 0.000 | 0.000 | 0.000 | 0.000 |
| <b>0.9</b> | 0.460        | 0.118 | 0.020 | 0.002 | 0.000 | 0.000 | 0.000 | 0.000 | 0.000 | 0.000 | 0.000 | 0.000 |
| <b>1</b>   | 0.000        | 0.000 | 0.000 | 0.000 | 0.000 | 0.000 | 0.000 | 0.000 | 0.000 | 0.000 | 0.000 | 0.000 |

**Table S14.** Fitting parameters of Sn K-Edge  $k^2$ -weighted EXAFS spectra for AgSnSe<sub>2</sub> sample.

| Path  | R (Å)       | N           | ( $\sigma^2$ ) | S <sub>0</sub> <sup>2</sup> | $\Delta E$ (eV) | R - factor |
|-------|-------------|-------------|----------------|-----------------------------|-----------------|------------|
| Sn-Se | 2.40 ± 0.04 | 4.74 ± 0.17 | 0.011 ± 0.001  | 0.796 ± 0.170               | 4.03 ± 2.08     | 0.035      |
| Sn-Sn | 3.82 ± 0.02 | 9.52 ± 0.42 | 0.021 ± 0.006  | 1.193 ± 0.427               | 5.860 ± 1.674   |            |

**Table S15.** *p*-type carrier concentration (*n*) of AgSn<sub>1-x</sub>Sb<sub>x</sub>Se<sub>2</sub> (x = 0-0.99) samples at 300 K.

| Sample                                                  | <i>n</i> (cm <sup>-3</sup> ) |
|---------------------------------------------------------|------------------------------|
| AgSnSe <sub>2</sub>                                     | 2.4 ± 0.2 x 10 <sup>22</sup> |
| AgSn <sub>0.9</sub> Sb <sub>0.1</sub> Se <sub>2</sub>   | 2.0 ± 0.3 x 10 <sup>22</sup> |
| AgSn <sub>0.8</sub> Sb <sub>0.2</sub> Se <sub>2</sub>   | 2.00 x 10 <sup>22</sup>      |
| AgSn <sub>0.5</sub> Sb <sub>0.5</sub> Se <sub>2</sub>   | 5.5 ± 0.3 x 10 <sup>21</sup> |
| AgSn <sub>0.3</sub> Sb <sub>0.7</sub> Se <sub>2</sub>   | 4.00 x 10 <sup>19</sup>      |
| AgSn <sub>0.01</sub> Sb <sub>0.99</sub> Se <sub>2</sub> | 4.0 ± 1.0 x 10 <sup>17</sup> |

**Table S16.** Oxidation states of Sn and corresponding electrical conductivity values for selected Sn-based chalcogenides.

| <b>Sample</b>                                         | <b>Oxidation state</b> | <b>Electrical conductivity<br/>(S/cm) at 300 K</b> | <b>Ref.</b>      |
|-------------------------------------------------------|------------------------|----------------------------------------------------|------------------|
| SnSe                                                  | +2                     | 1.18                                               | 48               |
| AgSnSe <sub>2</sub>                                   | +3                     | 3056                                               | <b>This work</b> |
| AgSn <sub>0.5</sub> Sb <sub>0.5</sub> Se <sub>2</sub> | +2 and +4              | 205                                                | <b>This work</b> |
| SnSe <sub>2</sub>                                     | +4                     | 0.85                                               | 49               |

**Table S17.** Parameters obtained from the fitting of low-temperature  $C_p/T$  vs.  $T^2$  data of AgSnSe<sub>2</sub> using a Debye-Einstein model with three Einstein oscillators

| Parameter                         | Value                |
|-----------------------------------|----------------------|
| $\gamma$ (J/mole.K <sup>2</sup> ) | $5.7 \times 10^{-3}$ |
| $\theta_D$ (K)                    | 202                  |
| $\theta_{E1}$ (K)                 | 122                  |
| $\theta_{E2}$ (K)                 | 23                   |
| $\theta_{E3}$ (K)                 | 62                   |



**Table S18.** Density of  $\text{AgSn}_{1-x}\text{Sb}_x\text{Se}_2$  ( $x = 0-0.99$ ) samples

| Sample                                          | Density (g/cc) |
|-------------------------------------------------|----------------|
| $\text{AgSnSe}_2$                               | 6.20           |
| $\text{AgSn}_{0.9}\text{Sb}_{0.1}\text{Se}_2$   | 5.90           |
| $\text{AgSn}_{0.8}\text{Sb}_{0.2}\text{Se}_2$   | 5.47           |
| $\text{AgSn}_{0.7}\text{Sb}_{0.3}\text{Se}_2$   | 5.39           |
| $\text{AgSn}_{0.6}\text{Sb}_{0.4}\text{Se}_2$   | 5.49           |
| $\text{AgSn}_{0.5}\text{Sb}_{0.5}\text{Se}_2$   | 5.80           |
| $\text{AgSn}_{0.3}\text{Sb}_{0.7}\text{Se}_2$   | 5.90           |
| $\text{AgSn}_{0.2}\text{Sb}_{0.8}\text{Se}_2$   | 5.71           |
| $\text{AgSn}_{0.01}\text{Sb}_{0.99}\text{Se}_2$ | 6.00           |

## References

- 1 Sheldrick, G. M. SHELXT–Integrated space-group and crystal-structure determination. *Foundations of Crystallography* **71**, 3-8 (2015).
- 2 Dolomanov, O. V., Bourhis, L. J., Gildea, R. J., Howard, J. A. & Puschmann, H. OLEX2: a complete structure solution, refinement and analysis program. *Applied Crystallography* **42**, 339-341 (2009).
- 3 Sheldrick, G. M. Crystal structure refinement with SHELXL. *Crystal Structure Communications* **71**, 3-8 (2015).
- 4 Roisnel, T., Rodríguez-Carvajal, J. & Gonzalez-Platas, J. in *Mater. Sci. Forum.* 118-123.
- 5 Juhas, P., Davis, T., Farrow, C. L. & Billinge, S. J. L. PDFgetX3: a rapid and highly automatable program for processing powder diffraction data into total scattering pair distribution functions. *Journal of Applied Crystallography* **46**, 560-566 (2013).  
<https://doi.org/doi:10.1107/S0021889813005190>
- 6 Farrow, C. L., Juhas, P., Liu, J. W., Bryndin, D., Božin, E. S., Bloch, J., Proffen, T. & Billinge, S. J. L. PDFfit2 and PDFgui: computer programs for studying nanostructure in crystals. *Journal of Physics: Condensed Matter* **19**, 335219 (2007).  
<https://doi.org/10.1088/0953-8984/19/33/335219>
- 7 Douvalis, A., Polymeros, A. & Bakas, T. in *Journal of Physics: Conference Series.* 012014 (IOP Publishing).
- 8 Nasredinov, F. S., Nemov, S. A., Masterov, V. F. & Seregin, P. P. Mössbauer studies of negative-U tin centers in lead chalcogenides. *Physics of the Solid State* **41**, 1741-1758 (1999). <https://doi.org/10.1134/1.1131091>
- 9 Oudah, M., Takegami, D., Kitao, S., Lado, J. L., Meléndez-Sans, A., Christovam, D. S., Yoshimura, M., Tsuei, K.-D., McNally, G., Isobe, M., Küster, K., Seto, M., Keimer, B., Bonn, D. A., Tjeng, L. H., Sawatzky, G. & Takagi, H. Charge-entropy-stabilized selenide  $\text{Ag}_x\text{Sn}_{1-x}\text{Se}$ . *Communications Materials* **6**, 58 (2025).  
<https://doi.org/10.1038/s43246-025-00778-3>

- 10 Masterov, V., Nasredinov, F., Nemov, S., Seregin, P., Irkaev, S., Melekh, B. & Troitskaya, N. Unconventional tin atom states in mixed silver and tin chalcogenides having NaCl structure. *Physics of the Solid State* **38**, 1805-1806 (1996).
- 11 Ravel, B. & Newville, M. ATHENA, ARTEMIS, HEPHAESTUS: data analysis for X-ray absorption spectroscopy using IFEFFIT. *Journal of Synchrotron Radiation* **12**, 537-541 (2005). <https://doi.org/doi:10.1107/S0909049505012719>
- 12 Jana, M. K., Pal, K., Warankar, A., Mandal, P., Waghmare, U. V. & Biswas, K. Intrinsic Rattler-Induced Low Thermal Conductivity in Zintl Type TlInTe<sub>2</sub>. *Journal of the American Chemical Society* **139**, 4350-4353 (2017). <https://doi.org/10.1021/jacs.7b01434>
- 13 Samanta, M., Pal, K., Pal, P., Waghmare, U. V. & Biswas, K. Localized Vibrations of Bi Bilayer Leading to Ultralow Lattice Thermal Conductivity and High Thermoelectric Performance in Weak Topological Insulator n-Type BiSe. *Journal of the American Chemical Society* **140**, 5866-5872 (2018). <https://doi.org/10.1021/jacs.8b02691>
- 14 Kim, H.-S., Gibbs, Z. M., Tang, Y., Wang, H. & Snyder, G. J. Characterization of Lorenz number with Seebeck coefficient measurement. *APL Materials* **3**, 041506 (2015). <https://doi.org/10.1063/1.4908244>
- 15 Blöchl, P. E. Projector augmented-wave method. *Physical Review B* **50**, 17953-17979 (1994). <https://doi.org/10.1103/PhysRevB.50.17953>
- 16 Kresse, G. & Joubert, D. From ultrasoft pseudopotentials to the projector augmented-wave method. *Physical Review B* **59**, 1758-1775 (1999). <https://doi.org/10.1103/PhysRevB.59.1758>
- 17 Perdew, J. P., Ruzsinszky, A., Csonka, G. I., Vydrov, O. A., Scuseria, G. E., Constantin, L. A., Zhou, X. & Burke, K. Restoring the Density-Gradient Expansion for Exchange in Solids and Surfaces. *Physical Review Letters* **100**, 136406 (2008). <https://doi.org/10.1103/PhysRevLett.100.136406>
- 18 Perdew, J. P., Burke, K. & Ernzerhof, M. Generalized Gradient Approximation Made Simple. *Physical Review Letters* **77**, 3865-3868 (1996). <https://doi.org/10.1103/PhysRevLett.77.3865>

- 19 Kresse, G. & Furthmüller, J. Efficiency of ab-initio total energy calculations for metals and semiconductors using a plane-wave basis set. *Computational Materials Science* **6**, 15-50 (1996). [https://doi.org:https://doi.org/10.1016/0927-0256\(96\)00008-0](https://doi.org/10.1016/0927-0256(96)00008-0)
- 20 Kresse, G. & Furthmüller, J. Efficient iterative schemes for ab initio total-energy calculations using a plane-wave basis set. *Physical Review B* **54**, 11169-11186 (1996). [https://doi.org:10.1103/PhysRevB.54.11169](https://doi.org/10.1103/PhysRevB.54.11169)
- 21 Ångqvist, M., Muñoz, W. A., Rahm, J. M., Fransson, E., Durniak, C., Rozyczko, P., Rod, T. H. & Erhart, P. ICET – A Python Library for Constructing and Sampling Alloy Cluster Expansions. *Advanced Theory and Simulations* **2**, 1900015 (2019). [https://doi.org:https://doi.org/10.1002/adts.201900015](https://doi.org/10.1002/adts.201900015)
- 22 Jia, B., Wu, D., Xie, L., Wang, W., Yu, T., Li, S., Wang, Y., Xu, Y., Jiang, B., Chen, Z., Weng, Y. & He, J. Pseudo-nanostructure and trapped-hole release induce high thermoelectric performance in PbTe. *Science* **384**, 81-86 (2024). [https://doi.org:10.1126/science.adj8175](https://doi.org/10.1126/science.adj8175)
- 23 Roychowdhury, S., Ghosh, T., Arora, R., Samanta, M., Xie, L., Singh, N. K., Soni, A., He, J., Waghmare, U. V. & Biswas, K. Enhanced atomic ordering leads to high thermoelectric performance in AgSbTe<sub>2</sub>. *Science* **371**, 722-727 (2021). [https://doi.org:10.1126/science.abb3517](https://doi.org/10.1126/science.abb3517)
- 24 Shi, X.-L., Zou, J. & Chen, Z.-G. Advanced Thermoelectric Design: From Materials and Structures to Devices. *Chemical Reviews* **120**, 7399-7515 (2020). [https://doi.org:10.1021/acs.chemrev.0c00026](https://doi.org/10.1021/acs.chemrev.0c00026)
- 25 Xiao, Y. & Zhao, L.-D. Seeking new, highly effective thermoelectrics. *Science* **367**, 1196-1197 (2020). [https://doi.org:10.1126/science.aaz9426](https://doi.org/10.1126/science.aaz9426)
- 26 Xu, S., Horta, S., Lawal, A., Maji, K., Lorion, M. & Ibáñez, M. Interfacial bonding enhances thermoelectric cooling in 3D-printed materials. *Science* **387**, 845-850 (2025). [https://doi.org:10.1126/science.ads0426](https://doi.org/10.1126/science.ads0426)
- 27 Yan, Q. & Kanatzidis, M. G. High-performance thermoelectrics and challenges for practical devices. *Nature Materials* **21**, 503-513 (2022). [https://doi.org:10.1038/s41563-021-01109-w](https://doi.org/10.1038/s41563-021-01109-w)

- 28 Ren, Z., Kriener, M., Taskin, A. A., Sasaki, S., Segawa, K. & Ando, Y. Anomalous metallic state above the upper critical field of the conventional three-dimensional superconductor AgSnSe<sub>2</sub> with strong intrinsic disorder. *Physical Review B* **87**, 064512 (2013). <https://doi.org:10.1103/PhysRevB.87.064512>
- 29 Huo, H., Zhang, Y., Guo, K., Yang, X., Xing, J., Li, S., Zhang, J. & Luo, J. Improvement of anisotropic thermoelectric performance in polycrystalline SnSe by metallic AgSnSe<sub>2</sub> compositing. *Journal of Alloys and Compounds* **908**, 164649 (2022). <https://doi.org:https://doi.org/10.1016/j.jallcom.2022.164649>
- 30 Niu, X., Lang, Y., Pan, L. & Wang, Y. Effects of AgSnSe<sub>2</sub> addition on the thermoelectric properties of Bi<sub>0.5</sub>Sb<sub>1.5</sub>Te<sub>3</sub>. *Journal of Alloys and Compounds* **956**, 170399 (2023). <https://doi.org:https://doi.org/10.1016/j.jallcom.2023.170399>
- 31 Liang, G., Lyu, T., Hu, L., Qu, W., Zhi, S., Li, J., Zhang, Y., He, J., Li, J., Liu, F., Zhang, C., Ao, W., Xie, H. & Wu, H. (GeTe)<sub>1-x</sub>(AgSnSe<sub>2</sub>)<sub>x</sub>: Strong Atomic Disorder-Induced High Thermoelectric Performance near the Ioffe–Regel Limit. *ACS Applied Materials & Interfaces* **13**, 47081-47089 (2021). <https://doi.org:10.1021/acsami.1c14801>
- 32 Liu, C., Huang, Z., Wang, D., Wang, X., Miao, L., Wang, X., Wu, S., Toyama, N., Asaka, T., Chen, J., Nishibori, E. & Zhao, L.-D. Dynamic Ag<sup>+</sup>-intercalation with AgSnSe<sub>2</sub> nano-precipitates in Cl-doped polycrystalline SnSe<sub>2</sub> toward ultra-high thermoelectric performance. *Journal of Materials Chemistry A* **7**, 9761-9772 (2019). <https://doi.org:10.1039/C9TA01678C>
- 33 Song, S., Tseng, Y.-C. & Mozharivskyj, Y. Optimizing thermoelectric performance of SnTe via alloying with AgSnSe<sub>2</sub> and PbTe. *Journal of Alloys and Compounds* **947**, 169415 (2023). <https://doi.org:https://doi.org/10.1016/j.jallcom.2023.169415>
- 34 Pan, L., Mitra, S., Zhao, L.-D., Shen, Y., Wang, Y., Felser, C. & Berardan, D. The Role of Ionized Impurity Scattering on the Thermoelectric Performances of Rock Salt AgPb<sub>m</sub>SnSe<sub>2+m</sub>. *Advanced Functional Materials* **26**, 5149-5157 (2016). <https://doi.org:https://doi.org/10.1002/adfm.201600623>

- 35 Dutta, M., Prasad, M. V. D., Pandey, J., Soni, A., Waghmare, U. V. & Biswas, K. Local Symmetry Breaking Suppresses Thermal Conductivity in Crystalline Solids. *Angewandte Chemie International Edition* **61**, e202200071 (2022). <https://doi.org/10.1002/anie.202200071>
- 36 Morelli, D. T., Jovovic, V. & Heremans, J. P. Intrinsically Minimal Thermal Conductivity in Cubic I-V-VI<sub>2</sub> Semiconductors. *Physical Review Letters* **101**, 035901 (2008). <https://doi.org/10.1103/PhysRevLett.101.035901>
- 37 Pan, L., Bérardan, D. & Dragoë, N. High Thermoelectric Properties of n-Type AgBiSe<sub>2</sub>. *Journal of the American Chemical Society* **135**, 4914-4917 (2013). <https://doi.org/10.1021/ja312474n>
- 38 Hua, X., I. Hegde, V. & Wolverton, C. Phase Stability and Ordering in Rock Salt-Based Thermoelectrics: NaSbX<sub>2</sub>, AgSbX<sub>2</sub>, and Their Alloys with PbX and SnX (X = S, Se, Te). *Chemistry of Materials* **31**, 9445-9452 (2019). <https://doi.org/10.1021/acs.chemmater.9b03318>
- 39 Geller, S. & Wernick, J. H. Ternary semiconducting compounds with sodium chloride-like structure: AgSbSe<sub>2</sub>, AgSbTe<sub>2</sub>, AgBiS<sub>2</sub>, AgBiSe<sub>2</sub>. *Acta Crystallographica* **12**, 46-54 (1959). <https://doi.org/10.1107/S0365110X59000135>
- 40 Guin, S. N., Chatterjee, A., Negi, D. S., Datta, R. & Biswas, K. High thermoelectric performance in tellurium free p-type AgSbSe<sub>2</sub>. *Energy & Environmental Science* **6**, 2603-2608 (2013). <https://doi.org/10.1039/C3EE41935E>
- 41 Wojciechowski, K., Schmidt, M., Toboła, J., Koza, M., Olech, A. & Zybala, R. Influence of Doping on Structural and Thermoelectric Properties of AgSbSe<sub>2</sub>. *Journal of Electronic Materials* **39**, 2053-2058 (2010). <https://doi.org/10.1007/s11664-009-1008-8>
- 42 Acharyya, P., Das, A., Arora, R., Samanta, M., Das, S., Ghosh, T., Waghmare, U. V. & Biswas, K. Electronic Structure Modulation in GeTe by Hg and Sb Codoping Leads to High Thermoelectric Performance. *Journal of the American Chemical Society* **147**, 19296-19304 (2025). <https://doi.org/10.1021/jacs.5c05116>

- 43 Lin, W., He, J., Su, X., Zhang, X., Xia, Y., Bailey, T. P., Stoumpos, C. C., Tan, G., Rettie, A. J. E., Chung, D. Y., Dravid, V. P., Uher, C., Wolverton, C. & Kanatzidis, M. G. Ultralow Thermal Conductivity, Multiband Electronic Structure and High Thermoelectric Figure of Merit in TlCuSe. *Advanced Materials* **33**, 2104908 (2021). [https://doi.org:https://doi.org/10.1002/adma.202104908](https://doi.org/https://doi.org/10.1002/adma.202104908)
- 44 Ghosh, T., Dutta, M., Sarkar, D. & Biswas, K. Insights into Low Thermal Conductivity in Inorganic Materials for Thermoelectrics. *Journal of the American Chemical Society* **144**, 10099-10118 (2022). [https://doi.org:10.1021/jacs.2c02017](https://doi.org/10.1021/jacs.2c02017)
- 45 Das, A., Pal, K., Acharyya, P., Das, S., Maji, K. & Biswas, K. Strong Antibonding I (p)–Cu (d) States Lead to Intrinsically Low Thermal Conductivity in CuBiI<sub>4</sub>. *Journal of the American Chemical Society* **145**, 1349-1358 (2023). [https://doi.org:10.1021/jacs.2c11908](https://doi.org/10.1021/jacs.2c11908)
- 46 Mukhopadhyay, S., Parker, D. S., Sales, B. C., Poretzky, A. A., McGuire, M. A. & Lindsay, L. Two-channel model for ultralow thermal conductivity of crystalline Tl<sub>3</sub>VSe<sub>4</sub>. *Science* **360**, 1455 (2018). [https://doi.org:10.1126/science.aar8072](https://doi.org/10.1126/science.aar8072)
- 47 Dutta, M., Matteppanavar, S., Prasad, M. V. D., Pandey, J., Warankar, A., Mandal, P., Soni, A., Waghmare, U. V. & Biswas, K. Ultralow Thermal Conductivity in Chain-like TlSe Due to Inherent Tl<sup>+</sup> Rattling. *Journal of the American Chemical Society* **141**, 20293-20299 (2019). [https://doi.org:10.1021/jacs.9b10551](https://doi.org/10.1021/jacs.9b10551)
- 48 Chandra, S., Arora, R., Waghmare, U. V. & Biswas, K. Modulation of the electronic structure and thermoelectric properties of orthorhombic and cubic SnSe by AgBiSe<sub>2</sub> alloying. *Chemical Science* **12**, 13074-13082 (2021). [https://doi.org:10.1039/D1SC03696C](https://doi.org/10.1039/D1SC03696C)
- 49 Zhou, C., Yu, Y., Zhang, X., Cheng, Y., Xu, J., Lee, Y. K., Yoo, B., Cojocaru-Mirédin, O., Liu, G., Cho, S.-P., Wuttig, M., Hyeon, T. & Chung, I. Cu Intercalation and Br Doping to Thermoelectric SnSe<sub>2</sub> Lead to Ultrahigh Electron Mobility and Temperature-Independent Power Factor. *Advanced Functional Materials* **30**, 1908405 (2020). [https://doi.org:https://doi.org/10.1002/adfm.201908405](https://doi.org/https://doi.org/10.1002/adfm.201908405)
